# Supplementary material for: Electrochemical oxidation of organic pollutants for the wastewater treatment: direct and indirect processes
Source: Royal Society of Chemistry journal article supplement (doi:10.1039/b517632h), 2006-01-01
Supplement: b517632h.pdf [file b517632h.pdf]

## Supplementary data

### **Electrochemical oxidation of organic pollutants for the wastewater treatment: direct and indirect processes**

*Carlos A. Martínez-Huitle\* and Sergio Ferro*

Department of Chemistry, University of Ferrara, via L. Borsari 46, I-44100 Ferrara, Italy

E-mail address: [Carlos.Martinez@unimi.it](mailto:Carlos.Martinez@unimi.it) – FAX number: +39 0532 240709

**Table S1** Direct anodic oxidation of organic compounds (anode materials listed in alphabetical order)

**Table S2** Indirect anodic oxidation of organic compounds (anode materials listed in alphabetical order)

**References**

**Table S1** Direct anodic oxidation of organic compounds (anode materials listed in alphabetical order)

| Anode          | Pollutant                       | <i>J, I or E</i>          | Efficiency                                                | Removal efficiency   | Comments                                                                         | Metabolites                                                                                                              | Ref. |
|----------------|---------------------------------|---------------------------|-----------------------------------------------------------|----------------------|----------------------------------------------------------------------------------|--------------------------------------------------------------------------------------------------------------------------|------|
| 3D carbon felt | nitroaromatic waste             | 500-1000 A/m <sup>2</sup> |                                                           | 10-50% COD removal   | H <sub>2</sub> SO <sub>4</sub> from 50-96%, T=25-40 °C                           | 2-methyl quinoxaline, 2,3- dimethyl quinoxaline, quinoxaline                                                             | 158  |
| Au             | benzoquinone                    | 10 mA/cm <sup>2</sup>     |                                                           | 46% (after 48 h)     | V=50 ml, [benzoquinone]= 50 ml stock solution, [stock solution]=100 mg/l         | hydroquinone, resorcinol, p-benzoquinone, pyrocatechol, formic, acetic, maleic, succinic, malonic, fumaric, acetic acids | 80   |
| Au             | penta-chlorophenol              |                           |                                                           |                      |                                                                                  |                                                                                                                          | 99   |
| BDD            | isopropanol                     | 30 mA/cm <sup>2</sup>     | 85%                                                       | 90%                  | 1 M H <sub>2</sub> SO <sub>4</sub> , transport limitations                       | acetic, oxalic and formic acids                                                                                          | 125  |
| BDD            | herbicides                      | I=100-450 mA              | ACE=8-12 %                                                | 40% (1h), 70-90%(3h) | pH=3, 0.5 M H <sub>2</sub> SO <sub>4</sub> , [herbicide]=100mg/l                 | 4-chlorophenol, 4-chloro-o-cresol, maleic and oxalic acids                                                               | 126  |
| BDD            | maleic, formic and oxalic acids | 30 mA/cm <sup>2</sup>     | ICE=0.2-0.8, carboxylic acid- and concentration- depended | 90%                  | H <sub>2</sub> SO <sub>4</sub> /Na <sub>2</sub> SO <sub>4</sub> , pH= 2, T=20 °C | CO <sub>2</sub>                                                                                                          | 148  |
| BDD            | phenol                          | 15-60 mA/cm <sup>2</sup>  | 100-50% (5Ah/l) and >50% (after 5Ah/l)                    |                      | [phenol]= 350-1500 mg/l, T=25 °C                                                 | hydroquinone, benzoquinone, maleic, fumaric and oxalic acids                                                             | 150  |
| BDD            | phenol                          | 5 mA/cm <sup>2</sup>      | ICE=0.5                                                   | 90%                  | HClO <sub>4</sub> 1 M, T=25 °C, [phenol]=20 mM                                   | hydroquinone, benzoquinone, catechol, maleic, fumaric and oxalic acids                                                   | 130  |
| BDD            | phenol                          | 300 A/cm <sup>2</sup>     | 33% CE                                                    | 90%                  | HClO <sub>4</sub> 1 M, T=25 °C, [phenol]=20 mM, pH=2, charge loading 4.5 Ah/l    | hydroquinone, benzoquinone, catechol, maleic, fumaric and oxalic acids                                                   | 130  |
| BDD            | acetic acid                     | 30 mA/cm <sup>2</sup>     | 90%                                                       | 98%                  | 1 M H <sub>2</sub> SO <sub>4</sub> , T=30 °C                                     | oxalic acid and CO <sub>2</sub>                                                                                          | 124  |
| BDD            | formic acid                     | 30 mA/cm <sup>2</sup>     | 90%                                                       | 100%                 | 1 M H <sub>2</sub> SO <sub>4</sub> , T=30 °C                                     | CO <sub>2</sub>                                                                                                          | 124  |
| BDD            | oxalic acid                     | 30 mA/cm <sup>2</sup>     | 70%                                                       | 90%                  | 1 M H <sub>2</sub> SO <sub>4</sub> , T=30 °C, transport limitations              | CO <sub>2</sub>                                                                                                          | 124  |
| BDD            | polyacrylates                   | 0.1-0.3 A/dm <sup>2</sup> | 37-100%                                                   | 99%                  | HClO <sub>4</sub> 1 M, T=30-60 °C                                                | hydroquinone, benzoquinone, catechol, maleic, fumaric and oxalic acids                                                   | 151  |
| BDD            | 2-naphthol                      | 15-60                     | ICE=100% (8 Ah/l)                                         | 90%                  | [2-naphthol]= 2-9 mM                                                             | polimerization and CO <sub>2</sub>                                                                                       | 140  |

|     |                                                                                  |                               |                                                                                                                  |                               |  |                                                                                                                        |                                                                                                               |     |
|-----|----------------------------------------------------------------------------------|-------------------------------|------------------------------------------------------------------------------------------------------------------|-------------------------------|--|------------------------------------------------------------------------------------------------------------------------|---------------------------------------------------------------------------------------------------------------|-----|
| BDD | phenolic compounds                                                               | mA/cm <sup>2</sup><br>153-510 |                                                                                                                  | 90%                           |  | [phenolic comp.]=100-500 mg/l,<br>Re number= 3500-15000                                                                | hydroquinone, benzoquinone, maleic,<br>aliphatic acids                                                        | 120 |
| BDD | chloranilic acid                                                                 | mA/cm <sup>2</sup><br>6.3-50  | GCE=0.7-0.4                                                                                                      | 90%                           |  | H <sub>2</sub> SO <sub>4</sub> , T=25-60 °C                                                                            | hydroquinone, ketomalonic and oxalic<br>acid                                                                  | 12  |
| BDD | multicomponent mixtures (phenol, phenyl-methanol, 1-phenyl-ethanol and m-cresol) | mA/cm <sup>2</sup><br>100-300 | approx. 100%                                                                                                     | COD removal<br>5000 – 300 ppm |  | Na <sub>2</sub> CO <sub>3</sub> 0.1 M supporting<br>electrolyte, pH=7.0 using H <sub>2</sub> SO <sub>4</sub><br>5% v/v |                                                                                                               | 117 |
| BDD | penta-chlorophenol                                                               | E=0.9 V                       | 96% CE                                                                                                           | 80%                           |  | buffer pH=5.5,<br>[penta-chlorophenol]=5.0x10 <sup>-5</sup> M                                                          | 2, 3, 4, 5, 6 - pentachloro- 4- pentachloro-<br>phenoxy- 2, 5- cyclohexadienone,<br>p-chloranil, hydroquinone | 132 |
| BDD | penta-chlorophenol                                                               | E=2.0 V                       | 90% CE                                                                                                           | 86%                           |  | buffer pH=5.5,<br>[penta-chlorophenol]=5.0x10 <sup>-5</sup> M                                                          | 2, 3, 4, 5, 6 - pentachloro- 4- pentachloro-<br>phenoxy- 2, 5- cyclohexadienone,<br>p-chloranil, hydroquinone | 132 |
| BDD | penta-chlorophenol                                                               | E=3.0 V                       |                                                                                                                  | 95%                           |  | buffer pH=5.5,<br>[penta-chlorophenol]=5.0x10 <sup>-5</sup> M                                                          | 2, 3, 4, 5, 6 - pentachloro- 4- pentachloro-<br>phenoxy- 2, 5- cyclohexadienone,<br>p-chloranil, hydroquinone | 132 |
| BDD | benzoic acid                                                                     | I=1.5 A                       | ICE=100% initial<br>times                                                                                        | 90% COD                       |  | 0.5 M HClO <sub>4</sub> , [benzoic<br>acid]=several concentrations                                                     | salicylic acid, 2, 5-dihydroxybenzoic acid<br>and hydroquinone                                                | 127 |
| BDD | polyhydroxy benzenes                                                             | mA/cm <sup>2</sup><br>15-60   | ICE= 100% from<br>4000-2000 COD<br>concentrations, and<br>decrease ICE from<br>1800 to 100 COD<br>concentrations | 90% COD                       |  | T=15-60°C, initial concentration<br>1.1-36 mmol/l, pH=2 and 12,<br>transport limitations                               | aliphatic compounds                                                                                           | 144 |
| BDD | Kodak® 6 first developer                                                         | 1000 A/m <sup>2</sup>         |                                                                                                                  | 73% COD                       |  | initial COD=32500 mg/l,<br>V=30 ml, I=0.31 A,<br>electrolysis time 6.25 h                                              |                                                                                                               | 131 |
| BDD | Kodak® E6 color developer                                                        | 1000 A/m <sup>2</sup>         |                                                                                                                  | 80% COD                       |  | initial COD=19050 mg/l,<br>V=30 ml, I=0.31 A,<br>electrolysis time 4.75 h                                              |                                                                                                               | 131 |
| BDD | phenol solution                                                                  | 1000 A/m <sup>2</sup>         |                                                                                                                  | 94% COD                       |  | initial COD=3570 mg/l,                                                                                                 |                                                                                                               | 131 |

|                             |                       |                                 |                                          |                                                                        |                                                                                                                   |                                                                                                                          |     |
|-----------------------------|-----------------------|---------------------------------|------------------------------------------|------------------------------------------------------------------------|-------------------------------------------------------------------------------------------------------------------|--------------------------------------------------------------------------------------------------------------------------|-----|
| BDD                         | hydroquinone solution | 500 A/m <sup>2</sup>            |                                          | 97% COD                                                                | V=60 ml, I=0.31 A, electrolysis time 18 h<br>initial COD=23530 mg/l,<br>V=60 ml, I=0.15 A, electrolysis time 38 h |                                                                                                                          | 131 |
| BDD                         | CN <sup>-</sup>       | 360 A/m <sup>2</sup>            | 41% CE                                   | 95% [CN <sup>-</sup> ] removal                                         | 1 M KOH                                                                                                           |                                                                                                                          | 135 |
| BDD                         | isopropanol           | 300 A/cm <sup>2</sup>           | > 95%                                    | < 90% conversion                                                       | [isopropanol]= 0.17 M                                                                                             | CO <sub>2</sub>                                                                                                          | 118 |
| BDD/<br>Electro-Fenton      | herbicides            | I=100-450 mA                    | ACE=8-12 %                               | 60% (1h),<br>80-99% (3h)                                               | pH=3, 0.5 M H <sub>2</sub> SO <sub>4</sub> ,<br>[herbicide]=100 mg/l                                              | 4-chlorophenol, 4-chloro-o-cresol, maleic and oxalic acids                                                               | 126 |
| Carbon<br>anode             | cyanide               | E=3-5 V                         | approx. 100% CE                          | 50%, CN removal depending flow of solution                             | catalyzed by copper, T=19-25 °C                                                                                   |                                                                                                                          | 159 |
| Carbon felt                 | chlorophenols         | 2.5-17 mA/cm <sup>2</sup>       | faradic efficiency 30%                   | 80%                                                                    | elimination of cyclic chlorinated compounds, pH= 2.5                                                              | aliphatic acids, consist mainly oxalic acid                                                                              | 67  |
| Ebonex/<br>PbO <sub>2</sub> | phenol                | CV method, -0.5-2.0V vs. NHE    |                                          |                                                                        | 1 M H <sub>2</sub> SO <sub>4</sub> , [phenol]=5 mM                                                                | partial destruction of phenol                                                                                            | 109 |
| Ebonex®                     | trichloroethylene     | E=2.5-4.3 V                     | high value, 32%, Ea=2.5 V                | 10-70% potential-depended                                              | pH=7, [trichloroethylene]= 1 mM, faster reaction kinetics                                                         | chlorine-containing products                                                                                             | 115 |
| Ebonex®                     | phenol                | CV method, -0.5-2.0V vs. NHE    |                                          |                                                                        | 1 M H <sub>2</sub> SO <sub>4</sub> , [phenol]=5 mM                                                                | inactive oxidation                                                                                                       | 109 |
| Glassy carbon               | benzoquinone          | 10 mA/cm <sup>2</sup>           |                                          | 100% (10 h)                                                            | V=50 ml, [Benzoquinone]= 50 ml sol.stock, [sol. Stock]=100 mg/l, carbon particles degradation                     | hydroquinone, resorcinol, p-benzoquinone, pyrocatechol, formic, acetic, maleic, succinic, malonic, fumaric, acetic acids | 80  |
| Glassy carbon               | benzene               | E=1.6-2.2 V, approx. 0.1-2.5 mA |                                          | 90% of transformation to benzoquinone                                  | 0.5 M H <sub>2</sub> SO <sub>4</sub> , T=25 °C                                                                    | p-benzoquinone, hydroquinone, phenol, 1-ethynyl, 4-methyl benzene                                                        | 157 |
| Glassy carbon               | Penta-chlorophenol    |                                 |                                          |                                                                        |                                                                                                                   | polymerization                                                                                                           | 99  |
| Glassy carbon               | phenol                | E1.7-2.3 V                      | 5-100%, CE depending on the experimental | 50-100%, [phenol]- and temperature- depended. For high potential a low | different experimental parameters: concentrations, temperature and potentials                                     | hydroquinone, benzoquinone, catechol, maleic and oxalic acids                                                            | 59  |

|                                                                            |                               |                            | conditions                                           | efficiency is achieved and vice versa                                                       |                                                                                                                                   |                                                       |     |
|----------------------------------------------------------------------------|-------------------------------|----------------------------|------------------------------------------------------|---------------------------------------------------------------------------------------------|-----------------------------------------------------------------------------------------------------------------------------------|-------------------------------------------------------|-----|
| Granular graphite                                                          | phenol                        | 0.03-0.32 A/m <sup>2</sup> | 70%, CE                                              | 70-50% mineralization                                                                       | %-month stable operation, current- and pH- depended                                                                               | different organic pollutants                          | 103 |
| Ir <sub>(30%)</sub> Ti <sub>(20%)</sub> Ce <sub>(50%)</sub> O <sub>2</sub> | p-benzoquinone<br>maleic acid | 10 mA/cm <sup>2</sup>      | CE(%)=0.3                                            |                                                                                             | [p-benzoquinone]=5x10 <sup>-4</sup> M, considering one-electron reaction                                                          | muconic acid, maleic and oxalic acids                 | 78  |
| Ir <sub>(30%)</sub> Ti <sub>(70%)</sub> O <sub>2</sub>                     | p-benzoquinone<br>maleic acid | 10 mA/cm <sup>2</sup>      | CE(%)=0.3                                            |                                                                                             | [p-benzoquinone]=5x10 <sup>-4</sup> M,, considering one-electron reaction                                                         | muconic acid, maleic and oxalic acids                 | 78  |
| IrO <sub>2</sub>                                                           | chloranilic acid              | 6.3-50 mA/cm <sup>2</sup>  | GCE=0.1                                              | 90%                                                                                         | H <sub>2</sub> SO <sub>4</sub> T=25-60°C                                                                                          | hydroquinone, ketomalonic and oxalic acid             | 12  |
| IrO <sub>2</sub> spray pyrolysis                                           | p-benzoquinone<br>maleic acid | 10 mA/cm <sup>2</sup>      | CE(%)=0.55                                           |                                                                                             | [p-benzoquinone]=5x10 <sup>-4</sup> M, considering one-electron reaction                                                          | muconic acid, maleic and oxalic acids                 | 78  |
| IrO <sub>2</sub> thermal decomposition                                     | p-benzoquinone<br>maleic acid | 10 mA/cm <sup>2</sup>      | CE(%)=0.45                                           |                                                                                             | [p-benzoquinone]=5x10 <sup>-4</sup> M, considering one-electron reaction                                                          | muconic acid, maleic and oxalic acids                 | 78  |
| Lead Anode and Packed bed lead particles                                   | aniline                       | 300 A/m <sup>2</sup>       | 15-40%, CE; depending on the experimental conditions | 97.5% aniline was oxidized and 72.5% of products was converted in CO <sub>2</sub> after 5 h | [aniline]=5.5x10 <sup>-3</sup> M, H <sub>2</sub> SO <sub>4</sub> , pH=2, V=400 ml, T=25 °C                                        | benzoquinone, maleic and carbon dioxide               | 73  |
| Packed bed reactor of PbO <sub>2</sub> pellets                             | phenol                        | I=1.0 A                    | 21% (after 2.5)                                      | phenol removal 72-100%, depending on the experimental conditions                            | [phenol]=1.4x10 <sup>-2</sup> M, 1M H <sub>2</sub> SO <sub>4</sub> , First Electrochemical oxidation studies, Innovative reactor. | phenol, benzoquinone, maleic acid and CO <sub>2</sub> | 85  |
| Packed bed reactor of PbO <sub>2</sub> pellets                             | phenol                        | I=2.0 A                    | 16% (after 1.5hrs.)                                  | phenol removal 72-100%, depending on the experimental conditions                            | [phenol]=1.4x10 <sup>-2</sup> M, 1M H <sub>2</sub> SO <sub>4</sub> , First Electrochemical oxidation studies, Innovative reactor. | phenol, benzoquinone, maleic acid and CO <sub>2</sub> | 85  |
| Packed bed reactor of                                                      | phenol                        | I=3.0 V                    | 16% (after 1.5hrs.)                                  | phenol removal 72-100%, depending on the experimental conditions                            | [phenol]=1.4x10 <sup>-2</sup> M, 1M H <sub>2</sub> SO <sub>4</sub> , First Electrochemical oxidation studies, Innovative reactor. | phenol, benzoquinone, maleic acid and CO <sub>2</sub> | 85  |

|                          |                              |                                                       |                       |                              |  |                                                                                                                            |                                                                                    |     |
|--------------------------|------------------------------|-------------------------------------------------------|-----------------------|------------------------------|--|----------------------------------------------------------------------------------------------------------------------------|------------------------------------------------------------------------------------|-----|
| PbO <sub>2</sub> pellets |                              |                                                       |                       |                              |  | dissolved oxygen after 1.5 h and considerable [CO <sub>2</sub> ] achieved                                                  |                                                                                    |     |
| PbO <sub>2</sub>         | indoles                      | I=0.5-500 mA                                          | 32%                   |                              |  | 0.05 Na <sub>2</sub> SO <sub>4</sub>                                                                                       | polymerization                                                                     | 75  |
| PbO <sub>2</sub>         | 1-Methyl indol               | I=0.5-500 mA                                          | 99%                   |                              |  | 0.05 Na <sub>2</sub> SO <sub>4</sub>                                                                                       | polymerization                                                                     | 75  |
| PbO <sub>2</sub>         | 2-Methyl-indol               | I=0.5-500 mA                                          | 58%                   |                              |  | 0.05 Na <sub>2</sub> SO <sub>4</sub>                                                                                       | polymerization                                                                     | 75  |
| PbO <sub>2</sub>         | 3-Methyl-indol               | I=0.5-500 mA                                          | 27%                   | 90% (60 mA) and 99% (100 mA) |  | 0.05 Na <sub>2</sub> SO <sub>4</sub>                                                                                       | polymerization                                                                     | 75  |
| PbO <sub>2</sub>         | tryptophan                   | I=0.5-500 mA                                          | 37%                   |                              |  | 0.05 Na <sub>2</sub> SO <sub>4</sub>                                                                                       | polymerization                                                                     | 75  |
| PbO <sub>2</sub>         | Phenol                       | Potential=1.4-2.5 V                                   |                       | 68-100%                      |  | T=65°C, 0.2M H <sub>2</sub> SO <sub>4</sub>                                                                                | hydroquinone, benzoquinone                                                         | 90  |
| PbO <sub>2</sub>         | glucose                      | 100-900 A/m <sup>2</sup>                              | EOI=30-60%            | 100%                         |  | 1M H <sub>2</sub> SO <sub>4</sub> , T=25-57°C, Specific interaction between Pb <sup>(IV)</sup> sites and carboxylic groups | 9 derivates of glucose                                                             | 76  |
| PbO <sub>2</sub>         | chloranilic acid             | 6.3-50 mA/cm <sup>2</sup>                             | GCE=0.7-0.2           | 90%                          |  | H <sub>2</sub> SO <sub>4</sub> , T=25-60°C                                                                                 | hydroquinone, ketomalonic and oxalic acid                                          | 12  |
| PbO <sub>2</sub>         | p-Benzoquinone/ maleic acid  | 10 mA/cm <sup>2</sup>                                 | CE(%)=0.6             |                              |  | [p-benzoquinone]=5x10 <sup>-4</sup> M assuming one-electron reaction                                                       | muconic acid, maleic and oxalic acids                                              | 78  |
| PbO <sub>2</sub>         | urine-waste biomass mixtures | E=1.8 V vs. NHE, around (0.2-0.4 mA/cm <sup>2</sup> ) |                       | 95%                          |  | H <sub>2</sub> SO <sub>4</sub> , T=80 °C, real matrix                                                                      | NO <sub>2</sub> , NO, NO <sub>2</sub> <sup>-3</sup> , NH <sub>4</sub> <sup>+</sup> | 84  |
| Planar graphite          | phenol                       | 10-100 A/m <sup>2</sup>                               | 24.6-63.5%, CE        | 6-17%, COD                   |  | NaOH as electrolyte, [phenol]=100 ppm                                                                                      | aliphatic compounds, CO <sub>2</sub> and water                                     | 104 |
| Porous Graphite          | phenol                       | 2.0 A                                                 | 48%, CE               |                              |  | different percentages of phenol removal according of current density and residence time                                    | different organics                                                                 | 167 |
| Pt                       | phenol                       | 30 mA/cm <sup>2</sup>                                 | 25% (1.5 h), EOI=0.13 |                              |  | pH influence in EOI                                                                                                        | maleic, fumaric, oxalic acids                                                      | 89  |
| Pt                       | phenol                       | Potential=                                            |                       | 34-47%                       |  | T=65 °C, 0.2 M H <sub>2</sub> SO <sub>4</sub>                                                                              | hydroquinone, benzoquinone, maleic, fumaric and oxalic acids                       | 90  |

|    |                                                         |                                           |                              |                                                  |                                                                                                                                       |                                                                                                                                  |     |
|----|---------------------------------------------------------|-------------------------------------------|------------------------------|--------------------------------------------------|---------------------------------------------------------------------------------------------------------------------------------------|----------------------------------------------------------------------------------------------------------------------------------|-----|
| Pt | glucose                                                 | 0.25-1.5 V<br>100-900<br>A/m <sup>2</sup> | EOI=15-20%                   | 40%                                              | 1 M H <sub>2</sub> SO <sub>4</sub> ,<br>T=25-57 °C,<br>Specific interaction between Pb <sup>(IV)</sup><br>sites and carboxylic groups | 9 derivates of glucose                                                                                                           | 76  |
| Pt | 4-Chlorophenol                                          | 0.18 A/cm <sup>2</sup>                    |                              | 78%                                              | pH decrease 6 to 4                                                                                                                    | benzoquinone, maleic, malonic, succinic,<br>oxalic, formic, acetic acids, chloride, 4-<br>Cl-maleic acid, Cl-acetic, diCl-acetic | 91  |
| Pt | phenol                                                  | 50 mA/cm <sup>2</sup>                     |                              | 50% (after 120 Ah/l)                             | [phenol]=2 gr/l,<br>T=70 °C, Na <sub>2</sub> SO <sub>4</sub> , pH=2                                                                   |                                                                                                                                  | 92  |
| Pt | dicamba (3, 6<br>dichloro-2<br>methoxy benzoic<br>acid) | I=100-450<br>mA                           | ACE=0-0.4 (1h)               | %TOC removal=21-65                               | pH=3, 0.5 M H <sub>2</sub> SO <sub>4</sub>                                                                                            | formic, maleic, oxalic acids                                                                                                     | 88  |
| Pt | urine-waste<br>biomass mixtures                         | 8 mA/cm <sup>2</sup>                      |                              | 78%                                              | T=60 °C, 72 h                                                                                                                         | NO <sub>2</sub> , NO, NO <sub>2</sub> <sup>-3</sup> , NH <sub>4</sub> <sup>+</sup>                                               | 84  |
| Pt | benzene                                                 | E=1.6-2.2 V,<br>aprox. 0.1-2.5<br>mA      |                              | 90%, conversion in<br>benzoquinone               | 0.5 M H <sub>2</sub> SO <sub>4</sub> , T=25°C                                                                                         | p-benzoquinone, hydroquinone, phenol,<br>1-ethynyl, 4-methyl benzene                                                             | 157 |
| Pt | Penta-<br>chlorophenol                                  |                                           |                              |                                                  |                                                                                                                                       | polymerazitation                                                                                                                 | 99  |
| Pt | Phenol                                                  | E=0.9-1.2 V                               | passive film was<br>observed | different concentrations<br>from 2-500 mM        | 0.09 M H <sub>2</sub> SO <sub>4</sub> , pH=1, mechanism<br>phenol oxidation, study by FTIR<br>spectroscopy                            | polymeratization reaction, quinone<br>structures                                                                                 | 93  |
| Pt | p-cresol                                                | E=0.9 V                                   | passive film was<br>observed | different concentrations<br>from 2-500 mM        | 0.09 M H <sub>2</sub> SO <sub>4</sub> , pH=1, mechanism<br>phenol oxidation, study by FTIR<br>spectroscopy                            | polymeratization reaction, quinone<br>structures                                                                                 | 93  |
| Pt | p-terbutyl<br>phenol                                    | E=0.9 V                                   | passive film was<br>observed | different concentrations<br>from 2-500 mM        | 0.09 M H <sub>2</sub> SO <sub>4</sub> , pH=1, mechanism<br>phenol oxidation, study by FTIR<br>spectroscopy                            | polymeratization reaction, quinone<br>structures                                                                                 | 93  |
| Pt | o, o' - biphenol                                        | E=0.9 V                                   | passive film was<br>observed | different concentrations<br>from 2-500 mM        | 0.09 M H <sub>2</sub> SO <sub>4</sub> , pH=1, mechanism<br>phenol oxidation, study by FTIR<br>spectroscopy                            | polymeratization reaction, quinone<br>structures                                                                                 | 93  |
| Pt | phenol                                                  | different<br>potentials                   | short times                  | identificacion of film:<br>XPS; electrochemistry | H <sub>2</sub> SO <sub>4</sub> , pH=0-1, study of the<br>electrode passivation                                                        | oligomers polymers                                                                                                               | 165 |
| Pt | phenol                                                  | 0.15 mA/cm <sup>2</sup>                   |                              | PtOH species at 0.5V                             | Pt oxide coverage (1.1 mC/cm <sup>2</sup> )                                                                                           | hydroquinone, benzoquinone                                                                                                       | 166 |



|                  |                             |                             |            |                                                                                |                                                                                                                                                                  |                                                                                                                              |     |
|------------------|-----------------------------|-----------------------------|------------|--------------------------------------------------------------------------------|------------------------------------------------------------------------------------------------------------------------------------------------------------------|------------------------------------------------------------------------------------------------------------------------------|-----|
| Pt               | tannis                      | E=3 V                       |            | 40%, COD removal alkaline media,, 60-100% COD removal according pH effect, 95% | NaCl 2000mg/l, effect for supporting electrolyte, effect of pH, effect of chlorine concentration                                                                 |                                                                                                                              | 87  |
| Pt               | ammonia                     | 8.5 A/m <sup>2</sup>        | 53% CE     |                                                                                | pH=8.2 using phosphate buffer, poor performance for organics                                                                                                     |                                                                                                                              | 94  |
| Pt               | phenol                      | 50 mA/cm <sup>2</sup>       |            | 100%                                                                           | Selective oxidation, PtOx is formed during oxidation, pH=2.0, T=70°C                                                                                             | aromatic intermediates (hydroquinone, benzoquinone, catechol). Aliphatic acids (maleic, fumaric, oxalic) and CO <sub>2</sub> | 6   |
| Pt or Ti/Pt      | phenol                      | 300 A/m <sup>2</sup>        |            | 30% TOC                                                                        | pH=12, [phenol]=1000mg/l, Na <sub>2</sub> SO <sub>4</sub> , competition with oxygen evolution reaction                                                           | stop oxidation with maleic and oxalic acids                                                                                  | 106 |
| Pt/WOx           | formic and oxalic acids     | 10 mA/cm <sup>2</sup>       | 100% CE    | approx. 95%                                                                    | [formic]=8x10 <sup>-4</sup> M, [oxalic]=1.0x10 <sup>-3</sup> M, 0.5 M H <sub>2</sub> SO <sub>4</sub>                                                             | CO <sub>2</sub>                                                                                                              | 100 |
| Pt/WOx           | oxalic acid                 | E=1.385 and 1.885 V vs. SCE | 100% CE    | approx. 99%                                                                    | [oxalic]=10 <sup>-3</sup> M, 0.5 M H <sub>2</sub> SO <sub>4</sub> . Determination of influence of stirring rate, potential-depended and oxidation rates constant | CO <sub>2</sub>                                                                                                              | 101 |
| PtO <sub>2</sub> | p-benzoquinone/ maleic acid | 10 mA/cm <sup>2</sup>       | CE(%)=0.55 |                                                                                | [p-benzoquinone]=5x10 <sup>-4</sup> M considering one-electron reaction                                                                                          | muconic acid, maleic and oxalic acids                                                                                        | 78  |
| pyrolytic carbon | penta-chlorophenol          |                             |            |                                                                                |                                                                                                                                                                  | carboxylic acids                                                                                                             | 99  |
| Sn(Sb) Oxide     | p-benzoquinone/ maleic acid | 10 mA/cm <sup>2</sup>       | CE(%)=0.55 |                                                                                | [p-benzoquinone]=5x10 <sup>-4</sup> M considering one-electron reaction                                                                                          | muconic acid, maleic and oxalic acids                                                                                        | 78  |
| Sn/WOx           | formic and oxalic acids     | 10 mA/cm <sup>2</sup>       | 100% CE    | approx. 95%                                                                    | [formic]=8x10 <sup>-4</sup> M, [oxalic]=1.0x10 <sup>-3</sup> M, 0.5 M H <sub>2</sub> SO <sub>4</sub>                                                             | CO <sub>2</sub>                                                                                                              | 100 |
| SnO <sub>2</sub> | glucose                     | 100-900 A/m <sup>2</sup>    | EOI<20%    | 40%                                                                            | 1 M H <sub>2</sub> SO <sub>4</sub> , T=25-57 °C, Specific interaction between Pb <sup>(IV)</sup> sites and carboxylic groups                                     | 9 glucose derivates                                                                                                          | 76  |
| SnO <sub>2</sub> | phenol                      | 50 mA/cm <sup>2</sup>       | EOI=30-40% | 90%                                                                            | T=70 °C, pH=12, [phenol]= 21 mM                                                                                                                                  | maleic, fumaric, oxalic acids                                                                                                | 168 |
| SnSb             | oxalic                      | E=1.385 and 1.885 V vs. SCE | 50% CE     | approx. 50%                                                                    | [oxalic]=10 <sup>-3</sup> M, 0.5 M H <sub>2</sub> SO <sub>4</sub> . Determination of influence of stirring rate, potential-depended                              | CO <sub>2</sub>                                                                                                              | 101 |

|                                           |                    |                            |                                                                                                         |                                                   |                                                                                                                              |                                                                                                                          |     |
|-------------------------------------------|--------------------|----------------------------|---------------------------------------------------------------------------------------------------------|---------------------------------------------------|------------------------------------------------------------------------------------------------------------------------------|--------------------------------------------------------------------------------------------------------------------------|-----|
| Stainless steel plates                    | acid orange II     | E=20.0 V                   | 100% ACE                                                                                                | 99% COD, 87% color removal                        | and oxidation rates constant granular activated carbon, pH controlled, air flow=0.1 m <sup>3</sup> /h                        |                                                                                                                          | 163 |
| Ta/PbO <sub>2</sub>                       | phenol             | 100-200 mA/cm <sup>2</sup> | faradic yields from 40-70% (after 20 Ah/l); Mean faradic yields=15% whatever temperature after 100 Ah/l | 60 °C=80%<br>70 °C=80%<br>90 °C=70%               | V=160 cm <sup>3</sup> ,<br>T= 60-90 °C                                                                                       | 1, 4 benzoquinone, maleic acid, hydroquinone, catechol, glyoxal, fumaric, glyoxalic, formic, oxalic, CO <sub>2</sub>     | 129 |
| Ti/70TiO <sub>2</sub> /30RuO <sub>2</sub> | cyanide            | 5-70 mA/cm <sup>2</sup>    | Energy consumption = 2 - 350 KWh/Kg (99%);<br>2 - 180 KWh/Kg (90%)                                      | 90% from 60 to 90 min,<br>99% from 120 to 180 min | 0.1 M NaOH, 0.1 M Na <sub>2</sub> SO <sub>4</sub> and 0.1 M Na <sub>2</sub> CO <sub>3</sub> , pH=13.5, conductivity=45 mS/cm |                                                                                                                          | 164 |
| Ti/BDD                                    | dyes               | 100 A/m <sup>2</sup>       | 70-90%                                                                                                  | 80-97% COD                                        | T=30 °C, V=25 ml, initial dyes concentration=1000mg/l, initial pH 4.70-6.7                                                   | Some polymeric products in the Monozol T-blue HFG oxidation                                                              | 153 |
| Ti/BDD                                    | acetic acid        | 200 A/m <sup>2</sup>       | 64% CE                                                                                                  | 97% COD (after 5.53 Ah/l)                         | V=30 ml, Na <sub>2</sub> SO <sub>4</sub> (2000 mg/l), T=30 °C                                                                | CO <sub>2</sub>                                                                                                          | 108 |
| Ti/BDD                                    | maleic acid        | 200 A/m <sup>2</sup>       | 61% CE                                                                                                  | 96% COD (after 6.43 Ah/l)                         | V=30 ml, Na <sub>2</sub> SO <sub>4</sub> (2000 mg/l), T=30 °C                                                                | CO <sub>2</sub>                                                                                                          | 108 |
| Ti/BDD                                    | phenol             | 100 A/m <sup>2</sup>       | 78.5% CE                                                                                                | 97% COD (after 4.85 Ah/l)                         | V=30 ml, Na <sub>2</sub> SO <sub>4</sub> (2000 mg/l), T=30 °C                                                                | CO <sub>2</sub>                                                                                                          | 108 |
| Ti/BDD                                    | orange II          | 200 A/m <sup>2</sup>       | 54,9% CE                                                                                                | 91% COD (after 6.25 Ah/l)                         | V=30 ml, Na <sub>2</sub> SO <sub>4</sub> (2000 mg/l), T=30 °C                                                                | several pollutants                                                                                                       | 108 |
| Ti/BDD                                    | reactive Red HE-3B | 200 A/m <sup>2</sup>       | 46.9% CE                                                                                                | 95% COD (after 6.25 Ah/l)                         | V=30 ml, Na <sub>2</sub> SO <sub>4</sub> (2000 mg/l), T=30 °C                                                                | several pollutants                                                                                                       | 108 |
| Ti/Fe-PbO <sub>2</sub>                    | benzoquinone       | 10 mA/cm <sup>2</sup>      |                                                                                                         | 99% (after 10 h)                                  | V=50 ml, [benzoquinone]= 50 ml stock solution, [stock solution]=100 mg/l, colorless solution                                 | hydroquinone, resorcinol, p-benzoquinone, pyrocatechol, formic, acetic, maleic, succinic, malonic, fumaric, acetic acids | 80  |
| Ti/IrO <sub>2</sub>                       | phenol             | <50 mA/cm <sup>2</sup>     | EOI=0.17                                                                                                | 71%                                               | alkaline media (pH>9), T=50 °C, [phenol]=50 mmol/dm <sup>3</sup>                                                             |                                                                                                                          | 81  |
| Ti/IrO <sub>2</sub>                       | 1, 4 benzoquinone  | 50 mA/cm <sup>2</sup>      |                                                                                                         | 60%                                               | [benzoquinone]=2 gr/l, T=70 °C, Na <sub>2</sub> SO <sub>4</sub> , pH=2                                                       | hydroquinone, fumaric, mesoxalic, oxalic, maleic acids                                                                   | 92  |

|                                                                       |                                       |                           |                                                                           |                            |                                                                                                                  |                                                                                                                              |     |
|-----------------------------------------------------------------------|---------------------------------------|---------------------------|---------------------------------------------------------------------------|----------------------------|------------------------------------------------------------------------------------------------------------------|------------------------------------------------------------------------------------------------------------------------------|-----|
| Ti/IrO <sub>2</sub>                                                   | chlorinated phenols                   | 0.06-5 mA/cm <sup>2</sup> | 1.8-54% CE                                                                | 60-90% COD                 | oxidation involving hydroxyl radicals                                                                            | different compounds                                                                                                          | 82  |
| Ti/IrO <sub>2</sub>                                                   | 1, 4-benzoquinone                     | 50 mA/cm <sup>2</sup>     | EOI=0.06                                                                  | 40% COD (after 80 Ah/l)    | pH=2.5, H <sub>2</sub> SO <sub>4</sub> or NaOH, 150 g/l Na <sub>2</sub> SO <sub>4</sub> , [benzoquinone]=14.8 mM | benzoquinone, aliphatic acids (maleic, fumaric, mesoxalic, oxalic) and CO <sub>2</sub>                                       | 110 |
| Ti/IrO <sub>2</sub>                                                   | aliphatic alcohols                    | I= 1-5 kA/m <sup>2</sup>  | 30-40% CE                                                                 | 90%                        | Isopropanol, Ethanol, methanol and propanol alcohols; influence of alcohol nature                                | CO <sub>2</sub>                                                                                                              | 111 |
| Ti/IrO <sub>2</sub>                                                   | phenol                                | 50 mA/cm <sup>2</sup>     |                                                                           | 80%                        | Selective oxidation, pH=2.0, T=70°C                                                                              | aromatic intermediates (hydroquinone, benzoquinone, catechol). Aliphatic acids (maleic, fumaric, oxalic) and CO <sub>2</sub> | 6   |
| Ti/IrO <sub>2</sub> /SnO <sub>2</sub> -Sb <sub>2</sub> O <sub>5</sub> | p-chlorophenol                        | 30 mA/cm <sup>2</sup>     |                                                                           | 95%                        | pH=2, Na <sub>2</sub> SO <sub>4</sub> , H <sub>2</sub> SO <sub>4</sub> , T=30 °C                                 |                                                                                                                              | 107 |
| Ti/MnO <sub>2</sub> -RuO <sub>2</sub>                                 | 3 dyes (Red 74, Yellow 126, Blue 139) | 2 A/dm <sup>2</sup>       | 24%                                                                       | 10% COD, 46% color removal | supporting electrolyte 0.1 M NaCl, T=25 °C                                                                       | different pollutants                                                                                                         | 95  |
| Ti/PbO <sub>2</sub>                                                   | phenol                                | 50 mA/cm <sup>2</sup>     | EOI=0.18                                                                  | 71%                        | alkaline media, pH>9, T=50 °C, [phenol]=50 mmol/dm <sup>3</sup>                                                  |                                                                                                                              | 81  |
| Ti/PbO <sub>2</sub>                                                   | benzoquinone                          | 10 mA/cm <sup>2</sup>     |                                                                           | 98% (after 24 h)           | Vol=50 ml, [benzoquinone]= 50 ml stock solution, [Stock solution]= 100 mg/l, colorless solution                  | hydroquinone, resorcinol, p-benzoquinone, pyrocatechol, formic, acetic, maleic, succinic, malonic, fumaric, acetic acids     | 80  |
| Ti/PbO <sub>2</sub>                                                   | phenol                                | 300 A/m <sup>2</sup>      |                                                                           | 40%, TOC                   | pH=12, [phenol]=1000 mg/l, Na <sub>2</sub> SO <sub>4</sub> , competition with oxygen evolution reaction          |                                                                                                                              | 106 |
| Ti/PbO <sub>2</sub>                                                   | benzoic acid                          | 30 mA/cm <sup>2</sup>     | EOI=0.10                                                                  | 30%                        | 0.5 M H <sub>2</sub> SO <sub>4</sub> , pH=12, Vol=150 ml                                                         | different pollutants                                                                                                         | 97  |
| Ti/PbO <sub>2</sub>                                                   | chlorinated phenols                   | 0.06-5 mA/cm <sup>2</sup> | 2.1-77% CE                                                                | 60-90% COD                 |                                                                                                                  | different metabolites                                                                                                        | 82  |
| Ti/PbO <sub>2</sub>                                                   | 2-chlorophenol                        | 8-16 mA/cm <sup>2</sup>   | faradic yields: 50% (8 mA/cm <sup>2</sup> ), 40% (16 mA/cm <sup>2</sup> ) | 80-90%                     | V=300 ml, flow=0.3-1.5 cm <sup>3</sup> /s, pH= 3 and 7, [2-chlorophenol]=1000 mg/l                               | oxalic acid                                                                                                                  | 74  |

|                                           |                                             |                             |                                     |                                              |                                                                                                                                                                                   |                                                                                |     |
|-------------------------------------------|---------------------------------------------|-----------------------------|-------------------------------------|----------------------------------------------|-----------------------------------------------------------------------------------------------------------------------------------------------------------------------------------|--------------------------------------------------------------------------------|-----|
| Ti/PbO <sub>2</sub>                       | 2-chlorophenol                              | 80-160 A/m <sup>2</sup>     | 35-40% CE                           | 80-95%                                       | Pb <sup>+2</sup> formation,<br>initial COD=1000 mg, T=25 °C                                                                                                                       |                                                                                | 74  |
| Ti/PbO <sub>2</sub>                       | landfill leachate                           | 50-150 A/m <sup>2</sup>     | 30% COD,<br>10% NH <sup>+4</sup> -N | 90% COD,<br>10% NH <sup>+4</sup> -N          | characteristics of leachate:<br>pH=8.3, BOD=80 mg/t,<br>COD=1200 mg/l, Total<br>Nitrogen=420 mg N/l<br>Amomonium-N=380 mg N/l<br>Chlorides=1600 mg Cl/l,<br>Conductivity=12 mS/cm | humic and fulvic acids, halogenated<br>compounds                               | 83  |
| Ti/PdO-<br>Co <sub>3</sub> O <sub>4</sub> | 3 dyes (Red 74,<br>Yellow 126,<br>Blue 139) | 2 A/dm <sup>2</sup>         | 58%                                 | 25% COD,<br>48% color removal                | supporting electrolyte 0.1 M NaCl,<br>T=25 °C                                                                                                                                     | different pollutants                                                           | 95  |
| Ti/Pt                                     | benzoic acid                                | 30 mA/cm <sup>2</sup>       | EOI=0.10                            | 30%                                          | 0.5 M H <sub>2</sub> SO <sub>4</sub> , pH=12, V=150 ml                                                                                                                            | different pollutants                                                           | 97  |
| Ti/Pt                                     | bisphenol A                                 | I=0.3 A                     | 30% CE                              | 60% (after 30 h)                             | E during process= 0.8-1.0 V and 3-4 V,<br>[bisphenol A]= 1.0 mM                                                                                                                   | aliphatic acids, tartaric acid, CO <sub>2</sub> and H <sub>2</sub> O           | 98  |
| Ti/Pt                                     | 2, 4-dihydroxy-<br>benzoic acid             | 100-300<br>A/m <sup>2</sup> | faradic yield 18%                   | 90% (after 4 Ah/l)                           | [dihydroxybenzoic acid]=<br>0.3 Kg/m <sup>3</sup>                                                                                                                                 | 2, 3, 4 trihydroxy-2, 4, 5 benzoic acid,<br>maleic, glyoxalic and oxalic acids | 162 |
| Ti/Pt                                     | tannery<br>wastewater                       | 2-6 A/dm <sup>2</sup>       | 6-26% CE                            | 50%                                          | tannery wastewater: 1) sampled<br>after aerobic treatment, 2) mixed,<br>3) sampled after passing through a<br>primary settling tank, 4) final<br>effluent                         | ammonia and other compounds                                                    | 96  |
| Ti/Pt                                     | 3 dyes<br>(Red 74, Yellow<br>126, Blue 139) | 2 A/dm <sup>2</sup>         | 21.40%                              | 9% COD,<br>40% color removal                 | supporting electrolyte 0.1M NaCl,<br>T=25°C                                                                                                                                       | different pollutants                                                           | 95  |
| Ti/Pt/Ir                                  | tannery<br>wastewater                       | 2-6 A/dm <sup>2</sup>       | 6-26% CE                            | 50-80%                                       | tannery wastewater: 1) sampled<br>after aerobic treatment, 2) mixed,<br>3) sampled after passing through a<br>primary settling tank, 4) final<br>effluent                         | ammonia and other compounds                                                    | 96  |
| Ti/Pt-Ir                                  | 3 dyes<br>(Red 74, Yellow<br>126, Blue 139) | 2 A/dm <sup>2</sup>         | 100%                                | 50% COD (after 40 min),<br>90% color removal | supporting electrolyte 0.1 M NaCl,<br>T=25 °C                                                                                                                                     | different pollutants                                                           | 95  |
| Ti/RhO <sub>x</sub> -<br>TiO <sub>2</sub> | 3 dyes<br>(Red 74, Yellow<br>126, Blue 139) | 2 A/dm <sup>2</sup>         | 77%                                 | 29% COD,<br>47% color removal                | supporting electrolyte 0.1 M NaCl,<br>T=25 °C                                                                                                                                     | different pollutants                                                           | 95  |

|                                       |                                       |                           |                                                                          |                            |                                                                                                                  |                                                                                                                          |     |
|---------------------------------------|---------------------------------------|---------------------------|--------------------------------------------------------------------------|----------------------------|------------------------------------------------------------------------------------------------------------------|--------------------------------------------------------------------------------------------------------------------------|-----|
| Ti/Ru                                 | benzoquinone                          | 10 mA/cm <sup>2</sup>     |                                                                          | 97% (after 48 h)           | V=50 ml, [benzoquinone]= 50 ml stock solution, [stock solution]= 100 mg/l                                        | hydroquinone, resorcinol, p-benzoquinone, pyrocatechol, formic, acetic, maleic, succinic, malonic, fumaric, acetic acids | 80  |
| Ti/RuO <sub>2</sub>                   | phenol                                | 50 mA/cm <sup>2</sup>     | EOI=0.14                                                                 | 71%                        | alkaline media, pH>9, T=50 °C, [phenol]=50 mmol/dm <sup>3</sup>                                                  |                                                                                                                          | 81  |
| Ti/RuO <sub>2</sub> -TiO <sub>2</sub> | 3 dyes (Red 74, Yellow 126, Blue 139) | 2 A/dm <sup>2</sup>       | 60-40%                                                                   | 26% COD, 42% color removal | supporting electrolyte 0.1 M NaCl, T=25 °C                                                                       | different pollutants                                                                                                     | 95  |
| Ti/Ru-Ti-Sb-SnO <sub>2</sub>          | benzoquinone                          | 10 mA/cm <sup>2</sup>     |                                                                          | 99.4% (after 24 h)         | V=50 ml, [benzoquinone]= 50 ml stock solution, [stock solution]= 100 mg/l                                        | hydroquinone, resorcinol, p-benzoquinone, pyrocatechol, formic, acetic, maleic, succinic, malonic, fumaric, acetic acids | 80  |
| Ti/Sb-SnO <sub>2</sub>                | benzoquinone                          | 10 mA/cm <sup>2</sup>     |                                                                          | 100% (after 0.5 h)         | V=50 ml, [benzoquinone]= 50 ml stock solution, [stock solution]= 100 mg/l, corrosion                             | hydroquinone, resorcinol, p-benzoquinone, pyrocatechol, formic, acetic, maleic, succinic, malonic, fumaric, acetic acids | 80  |
| Ti/SnO <sub>2</sub>                   | phenol                                | 50 mA/cm <sup>2</sup>     | EOI=0.58                                                                 | 90%                        | alkaline media, pH>9, T=50 °C, [phenol]=50 mmol/dm <sup>3</sup>                                                  | fumaric, maleic, oxalic acids                                                                                            | 81  |
| Ti/SnO <sub>2</sub>                   | 1, 4 benzoquinone                     | 50 mA/cm <sup>2</sup>     |                                                                          | 100% (after 50 Ah/l)       | [benzoquinone]=2 gr/l, T=70 °C, Na <sub>2</sub> SO <sub>4</sub> , pH=2                                           | CO <sub>2</sub>                                                                                                          | 92  |
| Ti/SnO <sub>2</sub>                   | benzoic acid                          | 30 mA/cm <sup>2</sup>     | EOI=0.79                                                                 | 90%                        | 0.5 M H <sub>2</sub> SO <sub>4</sub> , pH=12, V=150 ml                                                           | different pollutants                                                                                                     | 97  |
| Ti/SnO <sub>2</sub>                   | chlorinated phenols                   | 0.06-5 mA/cm <sup>2</sup> | 2.8-61% CE                                                               | 60-90% COD                 | oxidation involving hydroxyl radicals                                                                            | different compounds                                                                                                      | 82  |
| Ti/SnO <sub>2</sub>                   | 2-chlorophenol                        | 8-16 mA/cm <sup>2</sup>   | faradic yield: 50% (8 mA/cm <sup>2</sup> ), 35% (16 mA/cm <sup>2</sup> ) | 80-90%                     | V=300 ml, flow=0.3-1.5 cm <sup>3</sup> /s, pH= 3 and 7, [chlorophenol]=1000 mg/l                                 | oxalic acid                                                                                                              | 74  |
| Ti/SnO <sub>2</sub>                   | bisphenol A                           | I=0.3 A                   | 70% CE                                                                   | 100% (after 5 h)           | E <sub>during process</sub> =0.8-1.0 V and 3-4 V, [bisphenol A]= 1.0 mM                                          | >aliphatic acids, < CO <sub>2</sub> and H <sub>2</sub> O                                                                 | 98  |
| Ti/SnO <sub>2</sub>                   | acid red 14                           | 4.5 mA/cm <sup>2</sup>    |                                                                          | 60% TOC                    | electrolyte influence, mass transfer and reaction time process                                                   | naphthalene and other organic pollutants                                                                                 | 161 |
| Ti/SnO <sub>2</sub>                   | 1, 4-benzoquinone                     | 50 mA/cm <sup>2</sup>     | EOI=0.19                                                                 | 100% COD                   | pH=2.5, H <sub>2</sub> SO <sub>4</sub> or NaOH, 150 g/l Na <sub>2</sub> SO <sub>4</sub> , [benzoquinone]=14.8 mM | benzoquinone, aliphatic acids (maleic, fumaric, mesoxalic, oxalic) and CO <sub>2</sub>                                   | 110 |
| Ti/SnO <sub>2</sub>                   | 2-chlorophenol                        | 80-160 A/m <sup>2</sup>   | 35-40% CE                                                                | 80-95%                     | initial COD=1000 mg, T=25 °C                                                                                     | oxalic acid                                                                                                              | 74  |
| Ti/SnO <sub>2</sub>                   | landfill leachate                     | 50-150 A/m <sup>2</sup>   | 30% COD                                                                  | 90% COD                    | characteristics of leachate: pH=8.3, BOD=80 mg/l, COD=1200 mg/l, Total                                           | humic and fulvic acids, halogenated compounds                                                                            | 83  |

|                                                             |                                             |                                     |           |                               |                                                                                                                                                                                                                                    |                                                                                                                                                                                       |     |
|-------------------------------------------------------------|---------------------------------------------|-------------------------------------|-----------|-------------------------------|------------------------------------------------------------------------------------------------------------------------------------------------------------------------------------------------------------------------------------|---------------------------------------------------------------------------------------------------------------------------------------------------------------------------------------|-----|
|                                                             |                                             |                                     |           |                               | Nitrogen=420 mg N/l<br>amomonium-N=380 mg N/l<br>Chlorides=1600 mg Cl/l,<br>Conductivity=12 mS/cm<br>1 M H <sub>2</sub> SO <sub>4</sub> , [phenol]=5 mM<br>Chemisorptions of oxygen and<br>electrochemical conversion of<br>phenol |                                                                                                                                                                                       | 109 |
| Ti/SnO <sub>2</sub>                                         | phenol                                      | CV method,<br>-0.5-2.0 V vs.<br>NHE |           |                               |                                                                                                                                                                                                                                    |                                                                                                                                                                                       |     |
| Ti/SnO <sub>2</sub>                                         | phenol                                      | 50 mA/cm <sup>2</sup>               |           | 100%                          | Combustion of organics, pH=2.0,<br>T=70 °C                                                                                                                                                                                         | Aromatic intermediates (hydroquinone,<br>benzoquinone, catechol). The main<br>products are aliphatic acids (maleic,<br>fumaric, oxalic) but these were oxidized<br>to CO <sub>2</sub> | 6   |
| Ti/SnO <sub>2</sub> -<br>Sb <sub>2</sub> O <sub>5</sub>     | phenol                                      | 300 A/m <sup>2</sup>                |           | 100% TOC                      | pH=12, [phenol]=1000 mg/l,<br>Na <sub>2</sub> SO <sub>4</sub>                                                                                                                                                                      | CO <sub>2</sub>                                                                                                                                                                       | 106 |
| Ti/SnO <sub>2</sub> -<br>Sb <sub>2</sub> O <sub>5</sub>     | p-chlorophenol                              | 30 mA/cm <sup>2</sup>               |           | 75%                           | pH=2, Na <sub>2</sub> SO <sub>4</sub> , H <sub>2</sub> SO <sub>4</sub> , T=30 °C                                                                                                                                                   | -                                                                                                                                                                                     | 107 |
| Ti/SnO <sub>2</sub> -<br>Sb <sub>2</sub> O <sub>5</sub>     | 3 dyes<br>(Red 74, Yellow<br>126, Blue 139) | 2 A/dm <sup>2</sup>                 | 61%       | 23% COD,<br>45% color removal | supporting electrolyte 0.1 M NaCl,<br>T=25 °C                                                                                                                                                                                      | different pollutants                                                                                                                                                                  | 95  |
| Ti/SnO <sub>2</sub> -<br>Sb <sub>2</sub> O <sub>5</sub>     | acetic acid                                 | 200 A/m <sup>2</sup>                | 20.2% CE  | 30% COD<br>(after 5.53 Ah/l)  | V=30 ml, Na <sub>2</sub> SO <sub>4</sub> (2000 mg/l),<br>T=30 °C                                                                                                                                                                   | various pollutants                                                                                                                                                                    | 108 |
| Ti/SnO <sub>2</sub> -<br>Sb <sub>2</sub> O <sub>5</sub>     | maleic acid                                 | 200 A/m <sup>2</sup>                | 35.0% CE  | 55% COD<br>(after 6.43 Ah/l)  | V=30 ml, Na <sub>2</sub> SO <sub>4</sub> (2000 mg/l),<br>T=30 °C                                                                                                                                                                   | various pollutants                                                                                                                                                                    | 108 |
| Ti/SnO <sub>2</sub> -<br>Sb <sub>2</sub> O <sub>5</sub>     | phenol                                      | 100 A/m <sup>2</sup>                | 50.1% CE  | 64% COD<br>(after 4.85 Ah/l)  | V=30 ml, Na <sub>2</sub> SO <sub>4</sub> (2000 mg/l),<br>T=30 °C                                                                                                                                                                   | various pollutants                                                                                                                                                                    | 108 |
| Ti/SnO <sub>2</sub> -<br>Sb <sub>2</sub> O <sub>5</sub>     | orange II                                   | 200 A/m <sup>2</sup>                | 16.4% CE  | 27% COD<br>(after 6.25 Ah/l)  | V=30 ml, Na <sub>2</sub> SO <sub>4</sub> (2000 mg/l),<br>T=30 °C                                                                                                                                                                   | various pollutants                                                                                                                                                                    | 108 |
| Ti/SnO <sub>2</sub> -<br>Sb <sub>2</sub> O <sub>5</sub>     | reactive Red HE-<br>3B                      | 200 A/m <sup>2</sup>                | 11.0% CE  | 22% COD<br>(after 6.25 Ah/l)  | V=30 ml, Na <sub>2</sub> SO <sub>4</sub> (2000 mg/l),<br>T=30 °C                                                                                                                                                                   | various pollutants                                                                                                                                                                    | 108 |
| Ti/TiO <sub>2</sub> -<br>RuO <sub>2</sub> -IrO <sub>2</sub> | cresols                                     | I=0-6 A                             | 25-30% CE | 50-60% TOC                    | V=500 ml, T=30 °C                                                                                                                                                                                                                  | aliphatic compounds                                                                                                                                                                   | 160 |

BDD = Boron Doped Diamond, COD = Chemical Oxygen Demand, V = Volume, T = Temperature, [ ] = concentration,  $J$  = Current density,  $i$  = current, E = potential, ICE = Instantaneous current efficiency, ACE = Apparent current efficiency, EOI = Electrochemical oxidation index, CE = current efficiency, GCE = General current efficiency and Percentage (%).

**Table S2** Indirect anodic oxidation of organic compounds (anode materials listed in alphabetical order)

| <b>Anode</b>        | <b>Pollutant</b>     | <i>J, i or E</i>              | <b>E<br/>MA</b> | <b>E<br/>MP</b>            | <b>RE<br/>MA</b>              | <b>RE<br/>MP</b>                          | <b>Mediator</b>                                        | <b>Notes</b>                                                                                                                                                                                | <b>Metabolites</b>                                                                                   | <b>Ref</b> |
|---------------------|----------------------|-------------------------------|-----------------|----------------------------|-------------------------------|-------------------------------------------|--------------------------------------------------------|---------------------------------------------------------------------------------------------------------------------------------------------------------------------------------------------|------------------------------------------------------------------------------------------------------|------------|
| BDD                 | chlorophenols        | 30<br>mA/cm <sup>2</sup>      |                 | 95%<br>(before 15 h/l)     |                               | 100% COD                                  | hypochlorite<br>or peroxy-<br>disulphate               | Na <sub>2</sub> SO <sub>4</sub> 5000 mg/l,<br>T=30-60 °C                                                                                                                                    | oxalic, maleic and<br>fumaric acids,<br>hydro-quinone,<br>benzo-quinone,<br>tri-chloroacetic<br>acid | 147        |
| DSA                 | landfill<br>leachate | 7.5<br>A/dm <sup>2</sup>      |                 |                            | 29% COD,<br>36.1%<br>ammonium |                                           | chlorine/<br>hypochlorite                              |                                                                                                                                                                                             |                                                                                                      | 217        |
| Graphite            | landfill<br>leachate | 7.5<br>A/dm <sup>2</sup>      |                 |                            | 21% COD, 11%<br>ammonium      |                                           | chlorine/<br>hypochlorite                              |                                                                                                                                                                                             |                                                                                                      | 217        |
| Graphite            | nitrite ion          | 1.5 V vs<br>Ag/AgCl           |                 |                            |                               | 60-100%<br>potential-<br>depended         | HClO                                                   | 1-3 % wt NaCl                                                                                                                                                                               |                                                                                                      | 218        |
| Pb/PbO <sub>2</sub> | o-chlorotoluene      | 156-931<br>A/m <sup>2</sup>   |                 | 43% CE                     |                               | 10-40%<br>conversion                      | Mn(III)                                                | T=33-60 °C, acid concentration<br>(44-55wt%)                                                                                                                                                |                                                                                                      | 219        |
| Pt                  | alcohols             | 10-100<br>mA/cm <sup>2</sup>  |                 |                            |                               |                                           | NaBr, the<br>formation of<br>[Br• or Br <sup>+</sup> ] | synthetic utility                                                                                                                                                                           | carbonyl<br>compounds                                                                                | 20         |
| Pt                  | organic waste        | 6000<br>mA                    |                 |                            |                               |                                           | Ag(II)                                                 | Electrolyte 0.5 M AgNO <sub>3</sub> /7 M<br>HNO <sub>3</sub> , 1000 cm <sup>3</sup> , 70 °C, 970-<br>1030 bar, carrier gas= 200-1800<br>air                                                 |                                                                                                      | 214        |
| Pt                  | NO <sub>x</sub>      | 5000<br>mA                    |                 |                            |                               | 97%<br>NO <sub>x</sub> to NO <sub>3</sub> | Mn(III) or<br>Co(III)                                  | Electrolyte 0.1 M MnSO <sub>4</sub> /6 M<br>H <sub>2</sub> SO <sub>4</sub> ; 0.1 M CoSO <sub>4</sub> /3 M<br>H <sub>2</sub> SO <sub>4</sub> , 1000 cm <sup>3</sup> , 20 °C,<br>970-1030 bar |                                                                                                      | 214        |
| Pt                  | phenol               | 1<br>mA/cm <sup>2</sup>       |                 |                            |                               | 100% [phenol]                             | active chlorine                                        | Electrolyte 10 g/l NaCl + 100<br>mg/l phenol                                                                                                                                                | chlororganic<br>compounds                                                                            | 220        |
| Pt                  | aniline              | E=1.5-<br>1.9 V vs<br>Ag/AgCl | 21%             | 84% Ce(IV)<br>2-7% Co(III) | 1%                            | 3% Ce(IV),<br>4-20% Co(III)               | Ce(IV) and<br>Co(III)                                  | cyclic voltammetry method                                                                                                                                                                   | benzoquinone,<br>maleic acid                                                                         | 197        |
| Pt foil             | pesticides and       | 0.1-0.4                       |                 |                            |                               | <99%                                      | Ag(II) and                                             | Electrolyte 0.5 M AgNO <sub>3</sub> /7 M                                                                                                                                                    | CO <sub>2</sub>                                                                                      | 8          |



|                           |                   |                           |                     |                                                                    |                            |                                                                               |  |                                   |                                                                                                                                                                                                                                                                                 |                                                                          |     |
|---------------------------|-------------------|---------------------------|---------------------|--------------------------------------------------------------------|----------------------------|-------------------------------------------------------------------------------|--|-----------------------------------|---------------------------------------------------------------------------------------------------------------------------------------------------------------------------------------------------------------------------------------------------------------------------------|--------------------------------------------------------------------------|-----|
|                           | industrial wastes | A/m <sup>2</sup>          |                     |                                                                    |                            |                                                                               |  | Mn(III) or Co(III)                | HNO <sub>3</sub> , 1000 cm <sup>3</sup> , 70 °C, 970-1030 bar, carrier gas= 200-1800 air and Electrolyte 0.1 M MnSO <sub>4</sub> /6 M H <sub>2</sub> SO <sub>4</sub> ; 0.1 M CoSO <sub>4</sub> /3 M H <sub>2</sub> SO <sub>4</sub> , 1000 cm <sup>3</sup> , 20 °C, 970-1030 bar |                                                                          |     |
| Stainless steel           | nitrite           | 2.0 A                     |                     |                                                                    |                            | 30%                                                                           |  | hypochlorite                      | pH dependence                                                                                                                                                                                                                                                                   |                                                                          | 221 |
| Ti/ Sn-Pd- Ru-oxide       | landfill leachate | 7.5 A/dm <sup>2</sup>     |                     |                                                                    | 30.3% COD, 37.6% ammonium. | 67.6% COD, 92% ammonium                                                       |  | chlorine/ hypochlorite            | at 15 A/dm <sup>2</sup> and 7500 mg/l NaCl                                                                                                                                                                                                                                      | chloramines                                                              | 217 |
| Ti/Pt/Bi-PbO <sub>2</sub> | phenol            | 100 mA/cm <sup>2</sup>    | 24% (after 24 Ah/l) | 26% (after 26Ah/l) [NaCl]=0.1 M, 30% (after 20Ah/l) [NaCl]=0.5 M   | 79% COD, (after 24 Ah/l)   | 98% COD (after 24 Ah/l) [NaCl]=0.1 M, 99% COD (after 20 Ah/l) [NaCl]=0.5 M    |  | active chlorine                   | pH = 12                                                                                                                                                                                                                                                                         | CHCl <sub>3</sub>                                                        | 222 |
| Ti/IrO <sub>2</sub>       | phenol            | 0.1 A/cm <sup>2</sup>     | EOI=0.65            | EOI=0.65                                                           | 25% [phenol]               | 98%, [phenol]                                                                 |  | electrogenerated ClO <sup>-</sup> | selective oxidation, Na <sub>2</sub> SO <sub>4</sub> + NaCl                                                                                                                                                                                                                     | organo-chlorinated compounds and after to volatile chlorinated compounds | 24  |
| Ti/PbO <sub>2</sub>       | landfill leachate | 7.5 A/dm <sup>2</sup>     |                     |                                                                    | 27.4% COD, 33.1% ammonium. |                                                                               |  | chlorine/ hypochlorite            |                                                                                                                                                                                                                                                                                 |                                                                          | 217 |
| Ti/PbO <sub>2</sub>       | glucose           | 200-1200 A/m <sup>2</sup> |                     |                                                                    | 100% COD (after 20 h)      | 100% COD (after 20 h)                                                         |  | active chlorine                   | better [NaCl] = 5 g/l, electrolyte = 1 M Na <sub>2</sub> SO <sub>4</sub> + 0.01M NaOH                                                                                                                                                                                           | gluconic acid and carboxylic acids                                       | 13  |
| Ti/PbO <sub>2</sub>       | phenol            | 100 mA/cm <sup>2</sup>    | 22% (after 24Ah/l)  | 26% (after 26 Ah/l), [NaCl]=0.1 M 36% (after 26 Ah/l) [NaCl]=0.5 M | 75% COD (after 24 h/L)     | 98% COD, (after 24 Ah/L), [NaCl]=0.1M; 100% COD, (after 16 Ah/L), [NaCl]=0.5M |  | active chlorine                   | pH = 12                                                                                                                                                                                                                                                                         | CHCl <sub>3</sub>                                                        | 222 |
| Ti/Pt                     | o-chlorotoluene   | 781.25                    |                     |                                                                    | 40-44% CE                  | 10-40%,                                                                       |  | Mn(III)                           | T=33-60 °C, acid concentration                                                                                                                                                                                                                                                  |                                                                          | 219 |

|                         |                                    |                                                      |              |                                     |             |                              |                                                                                          |                                                                                                                        |                                                      |     |
|-------------------------|------------------------------------|------------------------------------------------------|--------------|-------------------------------------|-------------|------------------------------|------------------------------------------------------------------------------------------|------------------------------------------------------------------------------------------------------------------------|------------------------------------------------------|-----|
| Ti/Pt                   | glucose                            | A/m <sup>2</sup><br>1200                             |              | 60-90% CE                           | >5%, COD    | conversion<br>100% COD       | Hypochlorous<br>acid                                                                     | (44-55wt%)<br>Influence of temperature and<br>current density                                                          |                                                      | 14  |
| Ti/Pt                   | glucose                            | A/m <sup>2</sup><br>200-<br>1200<br>A/m <sup>2</sup> |              |                                     | 10-20%, COD | 100% COD<br>(after 18 h)     | active chlorine                                                                          | Better [NaCl] = 5 g/l,<br>electrolyte=1 M Na <sub>2</sub> SO <sub>4</sub> + 0.01<br>M NaOH,<br>J=1200 A/m <sup>2</sup> | gluconic acid and<br>carboxylic acids                | 13  |
| Ti/Pt<br>cylindrical    | landfill<br>leachate               | E=20-40<br>V                                         |              |                                     |             | 53% COD                      | Cl <sup>-</sup>                                                                          | pH dependence, energy<br>consumption = 4.29 kWh/Kg<br>COD removal                                                      |                                                      | 223 |
| Ti/RuO <sub>2</sub>     | aniline                            | E=1.2-<br>1.3V vs<br>Ag/AgCl                         | 4.71%        | 74% Ce(IV),<br>8-19% Co(III)        | 1.72%       | 3% Ce(IV)<br>2% Co(III)      | Ce(IV) and<br>Co(III)                                                                    | cyclic voltammetric method                                                                                             | benzoquinone,<br>maleic acid                         | 197 |
| Ti/SnO <sub>2</sub>     | phenol                             | 0.1<br>A/cm <sup>2</sup>                             | EOI=<br>0.1  | EOI=0.65                            |             |                              | electro-<br>generated OH<br>radicals, NaCl<br>does not<br>influence in<br>the efficiency | combustion, Na <sub>2</sub> SO <sub>4</sub> + NaCl                                                                     | carboxylic acids                                     | 24  |
| Ti/SnO <sub>2</sub> -Pt | glucose                            | 200-<br>1200<br>A/m <sup>2</sup>                     |              |                                     | 10-20% COD  | 50-90%, COD<br>(after 25 h)  | active chlorine                                                                          | better [NaCl] = 5 g/l,<br>electrolyte=1 M Na <sub>2</sub> SO <sub>4</sub> + 0.01<br>M NaOH                             | gluconic acid and<br>carboxylic acids                | 13  |
| Ti/TiRuO <sub>2</sub>   | synthetic<br>tannery<br>wastewater | 300-600<br>A/m <sup>2</sup>                          |              | 21.20%                              |             | 100%, COD<br>(after 36 Ah/l) | active chlorine                                                                          | [NaCl]=7 g/l, Na <sub>2</sub> SO <sub>4</sub> 8 g/l                                                                    | sulphides,<br>surfactants, tannic<br>acid, ammonium, | 224 |
| Ti-Ru-Sn                | 2-naphthol                         | 75<br>mA/cm <sup>2</sup>                             | EOI =<br>0.2 | EOI =0.3-0.7<br>[NaCl]-<br>depended | 30% COD     | 50-100% COD                  | active chlorine                                                                          | pH= 10, Electrolyte=0.5 N<br>Na <sub>2</sub> SO <sub>4</sub> , [2-naphthol]=5 mM,<br>T=25 °C, NaCl= 1-10 g/l           | phthalic acid,<br>maleic acid, and<br>other products | 25  |

BDD = Boron Doped Diamond, COD = Chemical Oxygen Demand, V = Volume, T = Temperature, [ ] = concentration, J = Current density, i = current, E = potential, ICE = Instantaneous current efficiency, ACE = Apparent current efficiency, EOI = Electrochemical oxidation index, CE = current efficiency, GCE = General current efficiency and Percentage (%).

EMA = Efficiency Mediator Absence, EMP = Efficiency Mediator Presence, REMA = Removal Efficiency Mediator Absence, REMP = Removal Efficiency Mediator Presence.

## References

- [1] S. E. Manahan, *Environmental Chemistry*, Boca Raton: Lewis Publishers, USA; 1994 pp. 223-240.
- [2] K. Rajeshwar, J. G. Ibáñez and G. M. Swain, *J. Appl. Electrochem.*, 1994, **24**, 1077-1091.
- [3] G. Chen, *Sep. Purif. Technol.*, 2004, **38**, 11-41.
- [4] K. Juttner, U. Galla and H. Schmieder, *Electrochim. Acta.*, 2000, **45**, 2575-2594.
- [5] C. A. Martínez-Huitle, S. Ferro and A. De Battisti. *Electrochim. Acta.*, 2004, **49**, 4027-4034.
- [6] Ch. Comninellis, *Electrochem. Acta*, 1994, **39**, 1857-1862.
- [7] B. Marselli, J. Garcia-Gomez, P. A. Michaud, M. A. Rodrigo and Ch. Comninellis. *J. Electrochem. Soc.* 2003, **150**, D79-D83.
- [8] U. Galla, P. Kritzer, J. Bringmann and H. Schmieder, *Chem. Eng. Technol.*, 2000, **23**, 230-233.
- [9] G. A. Steward, *US Pat.*, 5 756 874, 1998.
- [10] N. Nelson, *Platinum Metals Rev.*, 2002, **46**, 18-23.
- [11] P. A. Michaud, *These No. 2595, EPFL, Switzerland* (2002).
- [12] C. A. Martínez-Huitle, M. A. Quiroz, Ch. Comninellis, S. Ferro and A. De Battisti, *Electrochim. Acta*, 2004, **50**, 949-956.
- [13] F. Bonfatti, S. Ferro, F. Lavezzo, M. Malacarne, G. Lodi and A. De Battisti, *J. Electrochem. Soc.*, 2000, **147**, 592-596.
- [14] F. Bonfatti, A. De Battisti, S. Ferro, G. Lodi and S. Osti, *Electrochim. Acta*, 2000, **46**, 305-314.
- [15] C. A. Martínez-Huitle, S. Ferro and A. De Battisti, *Electrochem. Solid-State Lett.*, 2005, **8**, D35-D39.
- [16] F. Jacquet, A. Gaset, J. Simonet and G. Lacoste, *Electrochim. Acta*, 1985, **30**, 477-484.

- [17] M.-L. Tsai, W.-L. Lee and T.-C. Chou, *J. Chinese Inst. Chem. Eng.*, 2001, **32**, 517-524.
- [18] V. R. Islamgulova, E. N. Shitova, A. P. Tomilov and V. S. Pilyugin, *Russ. J. Electrochem.*, 1999, **35**, 899-901.
- [19] H. Li and L.-C. Jiang, *Jingxi Huagong*, 1999, **16**, 27-29.
- [20] T. Inokuchi, S. Matsumoto and S. Torii, *J. Org. Chem.*, 1991, **56**, 2416-2421.
- [21] D. Mantzavinos, R. Hellenbrand, A. G. Livingston and I. S. Metcalfe, *Appl. Catal. B Env.* 1996, **7**, 379-396.
- [22] J. Mieluch, A. Sadkowski, J. Wild and P. Zoltowski, *Prezm. Chem.*, 1975, **59**, 513-516.
- [23] A. Boscolo Boscoletto, F. Gottardi, L. Milan, P. Pannocchia, V. Tartari, M. Tavan, R. Amadelli, A. De Battisti, A. Barbieri, D. Patracchini and G. Battaglin, *J. Appl. Electrochem.*, 1994, **24**, 1852-1858.
- [24] Ch. Comninellis and A. Nerini, *J. Appl. Electrochem.*, 1995, **25**, 23-28.
- [25] M. Panizza and G. Cerisola, *Electrochim. Acta*, 2003, **48**, 1515-1519.
- [26] A. Savall, *Chimia*, 1995, **49**, 23-27.
- [27] R. Andrezzi, V. Caprio, A. Insola and R. Marotta, *Catalysis Today*. 1999, **53**, 51-59.
- [28] O. Legrini, E. Oliveros and A. M. Braun, *Chem. Rev.* 1993, **93**, 671-698.
- [29] P. M. Fedorak and S. E. Hrudey, *Water Res.*, 1984, **18**, 361-367.
- [30] R. Barreiro and J. R. Pratt, *Water Environ. Res.*, 1992, **64**, 632-641.
- [31] T. Reemtsma and M. Jekel, *Water Res.*, 1997, **31**, 1035-1046.

- [32] J. Grimm, D. Bessarabov and R. D. Sanderson, *Desalination*, 1998, **115**, 285-294.
- [33] J. O'M. Bockris (Ed.), *Electrochemistry of cleaner environments*, Plenum, New York, 1972.
- [34] D. Pletcher and F. Walsh (Eds.), *Industrial Electrochemistry*, Chapman and Hall, London, 1990.
- [35] D. Pletcher and N. L. Weinberg, *Chem. Eng.*, 1992, **Aug. 98-103**, 132-141.
- [36] K. Rajeshwar and J. G. Ibáñez, *Fundamentals and Application in Pollution Abatement*, Academic Press, San Diego, CA, 1997.
- [37] C. A. C. Sequeira (Ed.), *Environmentally oriented electrochemistry*, Elsevier, Amsterdam, 1994.
- [38] P. Tatapudi, J. M. Fenton, in: H. Gerischer and C. W. Tobias (Eds.), *Advances in electrochemical sciences and engineering*, Vol. 4, VCH-Veragsgesellschaft, Weinheim, 1995, 363.
- [39] D. Simonson, *Chem. Soc. Rev.*, 1997, **26**, 181-189.
- [40] S. Trasatti, *Int. J. Hydrogen Energy*, 1995, **20**, 835-844.
- [41] A. Kuhn, *J. Appl. Chem. Biotech.*, 1971, **21**, 29-64.
- [42] A. Nilsson, A. Ronlan and V. D. Parker, *J. C. S. Perkin Trans.* 1973, **1**, 2337-2345.
- [43] A. Dabrowski, J. Mieluch, A. Sadkaoski, J. Wild and P. Zoltowski, *Prezm. Chem.*, 1975, **54**, 653-655.
- [44] L. Papouchado, R. W. Sandford, G. Petrie and R. N. Adams, *J Electroanal. Chem.* 1975, **65**, 275-284.
- [45] R. C. Koile and D. C. Johnson, *Anal. Chem.*, 1979, **51**, 741-744.

- [46] V. Smith de Sucre, M.A. Sc. Thesis, University of British Columbia (1979).
- [47] J. Feng and D. C. Johnson, *J. Electrochem. Soc.*, 1990, **137**, 507-510.
- [48] H. Chang and D. C. Johnson, *J. Electrochem. Soc.*, 1990, **137**, 2452-2457.
- [49] H. Chang and D. C. Johnson, *J. Electrochem. Soc.*, 1990, **137**, 3108-3113.
- [50] J. E. Vitt and D. C. Johnson, *J. Electrochem. Soc.*, 1992, **139**, 774-778.
- [51] J. Feng, D. C. Johnson, S. N. Lowery and J. Carey, *J. Electrochem. Soc.*, 1994, **141**, 2708-2711.
- [52] S. E. Treimer, J. Feng, M. D. Scholten, D. C. Johnson and A. J. Davenport, *J. Electrochem. Soc.*, 2001, **148**, E459-E463.
- [53] Ch. Comninellis and E. Plattner, *Chimia*, 1988, **42**, 250-252.
- [54] N. B. Tahar and A. Savall, *J. Electrochem. Soc.*, 1998, **145**, 3427-3434.
- [55] Ch. Comninellis and A. De Battisti, *J. Chim. Phys.*, 1996, **93**, 673-679.
- [56] G. Foti, D. Gandini and Ch. Comninellis, *Curr. Top. Electrochem.*, 1997, **5**, 71-91.
- [57] O. Simond, V. Schaller and Ch. Comninellis, *Electrochim. Acta*, 1997, **42**, 2009-2012.
- [58] G. V. Sleptsov, A. I. Gladikii, E. Y. Sokol and S. P. Novikova, *Elektronnaya Obrabotka Materialov*, 1987, **6**, 69-72.
- [59] M. Grattell and D. W. Kirk, *Can. J. Eng.*, 1990, **68**, 997-1003.
- [60] J. Naumczyk, L. Szpyrkowicz and F. Z. Grandi, *Water Sci. Technol.*, 1996, **34**, 17-24.
- [61] O. J. Murphy, G. D. Hitchens, L. Kaba and C. E. Verostko, *Water Res.*, 1992, **26**, 443-451.

- [62] L. Szpyrkowicz, J. Naumczyk and F. Z. Grandi, *Toxicol. Environ. Chem.*, 1994, **44**, 189-202.
- [63] G. Rajalo and T. Petrovskaya, *Environ. Technol.*, 1996, **17**, 605-612.
- [64] N. N. Rao, K. M. Somasekhar, S. N. Kaul and L. Szpyrkowicz, *J. Chem. Technol. Biotechnol.* 2001, **76**, 1124-1131.
- [65] J. L. Boudenne, O. Cerclier, J. Galea and E. V. Vlist, *Appl. Catal. A: Gen.*, 1996, **143**, 185-202.
- [66] J. L. Boudenne and O. Cerclier, *Water Res.*, 1999, **33**, 494-504.
- [67] A. M. Polcaro and S. Palmas, *Ind. Eng. Chem. Res.*, 1997, **36**, 1791-1798.
- [68] J. Manriquez, J. L. Bravo, S. Gutierrez-Granados, S. S. Succar, C. Bied-Charreton, A. A. Ordaz and F. Bedioui, *Anal. Chim. Acta*, 1999, **378**, 159-168.
- [69] C. S. Hofseth and T. W. Chapman, *J. Electrochem. Soc.*, 1999, **146**, 199-207.
- [70] V. Smith de Sucre and A. P. Watkinson, *Can. J. Chem. Eng.*, 1981, **59**, 52-59.
- [71] M. Chettiar, M.A. Sc. Thesis, University of British Columbia (1981).
- [72] M. Chettiar and A. P. Watkinson, *Can. J. Chem. Eng.*, 1983, **61**, 568-574.
- [73] D. W. Kirk, H. Sharifian and F. R. Foulkes, *J. Appl. Electrochem.*, 1985, **15**, 285-292.
- [74] A. M. Polcaro, S. Palmas, F. Renoldi and M. Mascia, *J. Appl. Electrochem.*, 1999, **29**, 147-151.
- [75] P. G. Keech and N. J. Bunce, *J. Appl. Electrochem.*, 2003, **33**, 79-83.
- [76] F. Bonfatti, S. Ferro, F. Lavezzo, M. Malacarne, G. Lodi and A. De Battisti, *J. Electrochem. Soc.*, 1999, **146**, 2175-2179.

- [77] C. A. Martínez-Huitle, S. Ferro and A. De Battisti, *J. Appl. Electrochem.*, 2005, **35**, 1087-1093.
- [78] C. Bock and B. MacDougall, *J. Electrochem. Soc.*, 1999, **146**, 2925-2932.
- [79] M. A. Quiroz, S. Reyna, C. A. Martínez-Huitle, S. Ferro and A. De Battisti, *Appl. Catalysis B*, 2005, **59**, 259-266.
- [80] L. L. Houk, S. K. Johnson, J. Feng, R. S. Houk and D. C. Johnson, *J. Appl. Electrochem.*, 1998, **28**, 1167-1177.
- [81] Ch. Comninellis, *Trans. Ichem E. B*, 1992, **70**, 219-224.
- [82] J. D. Rodgers, W. Jedral and N. J. Bunce, *Environ. Sci. Technol.*, 1999, **33**, 1453-1457.
- [83] R. Cossu, A. M. Polcaro, M. C. Lavagnolo, M. Mascia, S. Palmas and F. Renoldi, *Environ. Sci. Technol.*, 1998, **32**, 3570-3573.
- [84] L. Kaba, G. D. Hitchens and J. O'M Bockris, *J. Electrochem. Soc.*, 1990, **137**, 1341-1345.
- [85] H. Sharifian and D. W. Kirk, *J. Electrochem. Soc.*, 1986, **133**, 921-924.
- [86] T. Shimamune and Y. Nakajima, *U.S. Pat.*, 5 545 306, 1996.
- [87] A. Buso, L. Balbo, M. Giomo, G. Farnia and S. Sandonà, *Ind. Eng. Chem. Res.*, 2000, **39**, 494-499.
- [88] E. Brillas, M. A. Baños and J. A. Garrido, *Electrochim. Acta*, 2003, **48**, 1697-1705.
- [89] Ch. Comninellis and C. Pulgarin, *J. Appl. Electrochem.*, 1991, **21**, 703.
- [90] B. Idbelkas and D. Takky, *Ann. Chim. Sci. Mat.*, 2001, **26**, 33-44.
- [91] S. K. Johnson, L. L. Houk, J. Feng, R. S. Houk and D. C. Johnson, *Environ. Sci. Technol.*, 1999, **33**, 2638-2644.



- [92] C. Seignez, C. Pulgarin, P. Péringer and Ch. Comninellis, *Swiss Chem.*, 1992, **14**, 25-30.
- [93] M. Grattell and D. W. Kirk, *J. Electrochem. Soc.*, 1992, **139**, 2736-2744.
- [94] L. Marincic and F. B. Leitz, *J. Appl. Electrochem.*, 1978, **8**, 333-345.
- [95] L. Szpyrkowicz, C. Juzzolino, S. N. Kaul, S. Daniele and M. D. De Faveri, *Ind. Eng. Chem Res.*, 2000, **39**, 3241.
- [96] L. Szpyrkowicz, J. Naumczyk and F. Zillio-Grandi, *Wat. Res.*, 1995, **29**, 517.
- [97] S. Stucki, R. Kötz, B. Carcer and W. Suter, *J. Appl. Electrochem.*, 1991, **21**, 99-104.
- [98] S. Tanaka, Y. Nakata, T. Kimura, Yustiawati, M. Kawasaki and H. Kuramitz, *J. Appl. Electrochem.*, 2002, **32**, 197-201.
- [99] M. Grattrell and B. MacDougall, *J. Electrochem. Soc.*, 1999, **146**, 3335.
- [100] C. Bock and B. MacDougall, *Electrochim. Acta*, 2002, **47**, 3361.
- [101] C. Bock, A. Smith and B. MacDougall, *Electrochim. Acta*, 2002, **48**, 57.
- [102] C. C. Ho and C. Y. Chan, *Water Res.*, 1986, **20**, 1523-1527.
- [103] Y. M. Awad and N. S. Abuzaid, *J. Environ. Sci. Health A*, 1997, **32**, 1393-1414.
- [104] N. Kannan, S. N. Sivadurai, J. L. Berchmans and R. Vijayavalli, *J. Environ. Sci. Health*, 1995, **A30**, 2185-2203.
- [105] C. A. Vincent and D. G. C. Weston, *J. Electrochem. Soc.*, 1972, **119**, 518-521.
- [106] R. Kötz, S. Stucki and B. Carcer, *J. Appl. Electrochem.*, 1991, **21**, 14-20.

- [107] C. L. P. S. Zanta, P. A. Michaud, Ch. Comninellis, A. R. De Andrade and J. F. C. Boodts, *J. Appl. Electrochem.*, 2003, **33**, 1211-1215.
- [108] X. Chen, G. Chen, F. Gao and P. L. Yue, *Environ. Sci. Technol.*, 2003, **37**, 5021-5026.
- [109] J. Grimm, D. Bessarabov, W. Maier, S. Storck and R.D. Sanderson, *Desalination*, 1998, **115**, 295-302.
- [110] C. Pulgarin, N. Alder, P. Péringer and Ch. Comninellis, *Water Res.*, 1994, **28**, 887-893.
- [111] O. Simond and Ch. Comninellis, *Electrochim. Acta.*, 1997, **42**, 2013-2018.
- [112] O. Weres and M. R. Hoffmann, *US Pat.*, 5 419 824, 1995.
- [113] J.M. Kesselman, O. Weres, N. S. Lewis and M. R. Hoffmann, *J. Phys. Chem. B*, 1997, **101**, 2637-2643.
- [114] J. R. Smith and F. C. Walsh, *J. Appl. Electrochem.*, 1998, **28**, 1021-1033.
- [115] G. Chen, E. A. Betterton and R. G. Arnold, *J. Appl. Electrochem.* 1999, **29**, 961-970.
- [116] A. Kraft, M. Stadelmann and M. Blaschke, *J. Hazard. Mater.*, 2003, **103**, 247-261.
- [117] A. Morao, A. Lopes, M. T. Pessoa de Amorim and I. C. Goncalves, *Electrochim. Acta*, 2004, **49**, 1587-1595.
- [118] A. Perret, W. Haenni, N. Skinner, X. M. Tang, D. Gandini, Ch. Comninellis, B. Correa and G. Foti, *Diam. Relat. Mater.*, 1999, **8**, 820-823.
- [119] A. M. Polcaro, A. Vacca, M. Mascia and S. Palmas, *Electrochim. Acta*, 2005, **50**, 1841-1847.
- [120] A. M. Polcaro, A. Vacca, S. Palmas and M. Mascia, *J. Appl. Electrochem.*, 2003, **33**, 885-892.

- [121] A. M. Polcaro, M. Mascia, S. Palmas and A. Vacca, *Electrochim. Acta*, 2004, **49**, 649-656.
- [122] B. Boye, P. A. Michaud, B. Marselli, M. M. Dieng, E. Brillas and Ch. Comninellis, *New Diam. Front. C. Tec.*, 2002, **12**, 63-72.
- [123] D. Gandini, Ch. Comninellis, A. Perret and W. Haenni, *ICHEME Symp. Ser.*, 1999, **145**, 181-190.
- [124] D. Gandini, E. Mahe, P. A. Michaud, W. Haenni, A. Perret and Ch. Comninellis, *J. Appl. Electrochem.* 2000, **30**, 1345-1350.
- [125] D. Gandini, P. A. Michaud, I. Duo, E. Mahe, W. Haenni, A. Perret and Ch. Comninellis, *New Diam. Front. C. Tec.*, 1999, **9**, 303-316.
- [126] E. Brillas, B. Boye, I. Sires, J. A. Garrido, R. M. Rodriguez, C. Arias, P.L. Cabot and Ch. Comninellis, *Electrochim. Acta*, 2004, **49**, 4487-4496.
- [127] F. Montilla, P. A. Michaud, E. Morallon, J. L. Vazquez and Ch. Comninellis, *Electrochim. Acta*, 2002, **47**, 3509-3513.
- [128] G. Lissens, J. Pieters, M. Verhaege, L. Pinoy and W. Verstraete, *Electrochim. Acta*, 2003, **48**, 1655-1663.
- [129] I. Troster, M. Fryda, D. Herrmann, L. Schafer, W. Haenni, A. Perret, M. Blaschke, A. Kraft and M. Stadelmann, *Diam. Relat. Mater.* 2002, **11**, 640-645.
- [130] J. Iniesta, P. A. Michaud, M. Panizza, G. Cerisola, A. Aldaz and Ch. Comninellis, *Electrochim. Acta*, 2001, **46**, 3573-3578.
- [131] J. J. Carey and J. C. S. Christ, S. N. Lowery, *US Pat.*, 5 399 247, 1995.
- [132] L. Codognoto, S. A. S. Machado and L. A. Avaca, *J. Appl. Electrochem.*, 2003, **33**, 951-957.

- [133] L. Gherardini, P. A. Michaud, M. Panizza, Ch. Comninellis and N. Vatistas, *J. Electrochem. Soc.*, 2001, **148**, D78-D82.
- [134] L. Ouattara, I. Duo, T. Diaco, A. Ivandini, K. Honda, T. N. Rao, A. Fujishima and Ch. Comninellis, *New Diam. Front. C. Tec.*, 2003, **13**, 97-108.
- [135] M. Fryda, D. Hermann, L. Schafer, C. P. Klages A. Perret, W. Haenni, Ch. Comninellis and D. Gandini, *New Diamond Front. C. Technol.*, 1999, **9**, 229–240.
- [136] M. Panizza and G. Cerisola, *Electrochim. Acta*, 2003, **48**, 3491-3497.
- [137] M. Panizza and G. Cerisola, *Electrochim. Acta*, 2004, **49**, 3221-3226.
- [138] M. Panizza, M. Delucchi and G. Cerisola, *J. Appl. Electrochem.*, 2005, **35**, 357–361.
- [139] M. Panizza, P. A. Michaud, G. Cerisola and Ch. Comninellis, *Electrochem. Commun.*, 2001, **3**, 336-339.
- [140] M. Panizza, P. A. Michaud, G. Cerisola and Ch. Comninellis, *J. Electroanal. Chem.*, 2001, **507**, 206-214.
- [141] M. A. Rodrigo, P. A. Michaud, I. Duo, M. Panizza, G. Cerisola and Ch. Comninellis, *J. Electrochem. Soc.*, 2001, **148**, D60-D64.
- [142] P. Canizares, C. Saez, J. Lobato and M. A. Rodrigo, *Electrochim. Acta*, 2004, **49**, 4641-4650.
- [143] P. Canizares, C. Saez, J. Lobato and M. A. Rodrigo, *Ind. Eng. Chem. Res.*, 2004, **43**, 1944-1951.
- [144] P. Canizares, C. Saez, J. Lobato and M. A. Rodrigo, *Ind. Eng. Chem. Res.*, 2004, **43** 6629-6637.
- [145] P. Canizares, F. Martinez, M. Diaz, J. Garcia-Gomez and M. A. Rodrigo, *J. Electrochem. Soc.*, 2002, **149**, D118-D124.

- [146] P. Canizares, J. Garcia-Gomez, C. Saez and M. A. Rodrigo, *J. Appl. Electrochem.*, 2003, **33**, 917-927.
- [147] P. Canizares, J. Garcia-Gomez, C. Saez and M. A. Rodrigo, *J. Appl. Electrochem.*, 2004, **34**, 87-94.
- [148] P. Canizares, J. Garcia-Gomez, J. Lobato and M. A. Rodrigo, *Ind. Eng. Chem. Res.*, 2003, **42**, 956-962.
- [149] P. Canizares, J. Garcia-Gomez, J. Lobato and M. A. Rodrigo, *Ind. Eng. Chem. Res.*, 2004, **43**, 1915-1922.
- [150] P. Canizares, M. Diaz, J. A. Dominguez, J. Garcia-Gomez and M. A. Rodrigo, *Ind. Eng. Chem. Res.*, 2002, **41**, 4187-4194.
- [151] R. Bellagamba, P. A. Michaud, Ch. Comninellis and N. Vatistas, *Electrochem. Commun.*, 2002, **4**, 171-176.
- [152] S. Hattori, M. Doi, E. Takahashi, T. Kurosu, M. Nara, S. Nakamatsu, Y. Nishiki, T. Furuta and M. Iida, *J. Appl. Electrochem.*, 2003, **33**, 85-91.
- [153] X. Chen, G. Chen and P. L. Yue, *Chem. Eng. Sci.*, 2003, **58**, 995-1001.
- [154] F. Beck, W. Kaiser and H. Krohn, *Electrochim. Acta.*, 2000, **45**, 4691-4695.
- [155] P. A. Michaud, E. Mahe, W. Haenni, A. Perret and Ch. Comninellis, *Electrochem. Solid-State Lett.*, 2000, **3**, 77-79.
- [156] Ch. Comninellis, P. A. Michaud, W. Haenni, A. Perret and M. Fryda, *PCT Pat.*, WO 01/25508, 2001.
- [157] K.-W. Kim, M. Kuppuswamy and R. F. Savinell, *J. Appl. Electrochem.*, 2000, **30**, 543-549.
- [158] N. E. Jiménez Jado, C. Fernández Sánchez and J. R. Ochoa Gómez, *J. Appl. Electrochem.*, 2004, **34**, 551-556.
- [159] S. Hofseth and T. W. Chapman, *J. Electrochem. Soc.*, 1999, **146**, 199-207.
- [160] D. Rajkumar and K. Palanivelu, *Ind. Eng. Chem. Res.*, 2003, **42**, 1833.

- [161] A. Wang, J. Qu, H. Liu and J. Ge, *Chemosphere*, 2004, **55**, 1189-1196.
- [162] R. H. de Lima Leite, P. Cognet, A.-M. Wilhelm and H. Delmas, *J. Appl. Electrochem.*, 2003, **33**, 693-701.
- [163] Y. Xiong, P. J. Strunk, H. Xia, X. Zhu and H. T. Karlsson, *Wat. Res.* 2001, **35**, 4226-4230.
- [164] M. R. V. Lanza and R. Bertazzoli, *Ind. Eng. Chem. Res.*, 2002, **41**, 22-26.
- [165] M. Grattell and D.W. Kirk, *J. Electrochem. Soc.*, 1993, **140**, 903-911.
- [166] M. Grattell and D.W. Kirk, *J. Electrochem. Soc.*, 1993, **140**, 1535-1540.
- [167] Y. M. Awad and N. S Abuzaid, *Separation and Purification Technology*, 2000, **18**, 227-236.
- [168] Ch. Comninellis and C. Pulgarin, *J. Appl. Electrochem.*, 1993, **23**, 108-112.
- [169] T. D. Kubritskaya, I. V. Drako, V. N. Sorokina and R. V. Drondina, *Surf. Eng. Appl. Electrochem.*, 2000, **6**, 62-75.
- [170] M. N. Rabilizirov and A. M. Gol'man, *Khimiya i Tekhnologia Vody*, 1986, **8**, 87-88.
- [171] V. Il'in, V. A. Kolesnikov and Yu. I. Parshina, *Glass Ceram.*, 2002, **59**, 242-244.
- [172] I. A. Zolotukhin, V. A. Vasev and A. L. Iukin, *Khimiya i Tekhnologia Vody*, 1983, **5**, 252-255.
- [173] R. Nikolaevsky, M. Monosov, E. Monosov, E. Sharony, and D. Gurevich, *US patent n. 5,792,336* (1998).
- [174] N. Djeiranishvili, S. Boutine, and G. E. Meerkop, *PCT Int. Appl. n. WO 9,827,013* (1998).
- [175] X. M. Zhan, J. L. Wang, X. H. Wen, and Y. Qian, *Environ. Tech.* 2001, **22**, 1105-1111.
- [176] D. Rajkumar, J. G. Kim, and K. Palanivelu, *Chem. Eng. & Technol.*, 2005, **28**, 98-105.

- [177] S. H. Lin and C. L. Wu, *J. Environ. Sci. Health A*, 1997, **32**, 2125-2138.
- [178] T. Matsue, M. Fujihira and T. Osal, *J. Electrochem. Soc.*, 1981, **128**, 2565-2569.
- [179] E. Brillias, R. M. Bastida and E. Llosa, *J. Electrochem. Soc.*, 1995, **142**, 1733-1741.
- [180] E. Brillias, E. Mur and J. Casado, *J. Electrochem. Soc.*, 1996, **143**, L49-L53.
- [181] E. Brillias, R. Sauleda and J. Casado, *J. Electrochem. Soc.*, 1997, **144**, 2374-2379.
- [182] E. Brillias, R. Sauleda and J. Casado, *J. Electrochem. Soc.*, 1998, **145**, 759-765.
- [183] E. Brillias, E. Mur, R. Sauleda, L. Sanchez, F. Peral, X. Domenech and J. Casado, *Appl. Catal. B: Environ.*, 1998, **16**, 31-42.
- [184] S. Stucki, H. Baumann, H. J. Christen and R. Kotz, *J. Appl. Electrochem.*, 1987, **17**, 773-778.
- [185] W. El-Shal, H. Khordagui, O. El-Sebaie, F. El-Sharkawi and G. H. Sedahmed, *Desalination*, 1991, **99**, 149-157.
- [186] D. Dobos, *Electrochemical Data*, Elsevier Scientific Publishing Company - Amsterdam-Oxford-New York (1975).
- [187] P. Vaudano, E. Plattner, and Ch. Comninellis, *Chimia*, 1995, **49**, 12-16.
- [188] J. C. Farmer, F. T. Wang, R. A. Hawley-Fedder, P. R. Lewis, L. J. Summers and L. Foiles, *J. Electrochem. Soc.*, 1992, **139**, 654-662.
- [189] J. C. Farmer and F. T. Wang, *ICHEME Symp. Ser.*, 1992, **127**, 203-214.
- [190] R. G. Hickman, J. C. Farmer and F. T. Wang, *American Chem. Soc. Symp. Series*, 1993, **518**, 430-438.
- [191] F. Bringmann, K. Ebert, U. Galla and H. Schmieder, *J. Appl. Electrochem.*, 1995, **25**, 846-851.

- [192] V. Cochechi, C. Radovan, G. A. Ciorba and I. Vlaiciu, *Revue Roumaine de Chimie*, 1995, **40**, 615-619.
- [193] A. Paire, D. Espinoux, M. Masson and M. Lecomte, *Radiochim. Acta*, 1997, **78**, 137-143.
- [194] M. Abdel Azzem and E. Steckhan, *Heterocycles*, 1990, **31**, 1959-1965.
- [195] L. W. Gray, R. G. Hickman and J. C. Farmer, Solvent Substitution, Annu. Int. Workshop Solvent Substitution, 1st, (1990) 281-284.
- [196] J. C. Farmer, F. T. Wang, P. R. Lewis and L. J. Summers, *J. Electrochem. Soc.*, 1992, **139**, 3025-3029.
- [197] Y. H. Chung and S. M. Park, *J. App. Electrochem.* 2000, **30**, 685-691.
- [198] W. K. Choi, K. W. Lee, Y. M. Kim, B. G. Ahn and W. Z. Oh, *J. Nuclear Sci. Technol.*, 2000, **37**, 173-179.
- [199] C. M. Goncea, *Revista de Chimie (Bucharest, Romania)*, 2000, **51**, 896-897
- [200] I. S. Vasil'eva, V. L. Kornienko and G. A. Kolyagin, *Khimiya v Interesakh Ustoichivogo Razvitiya*, 2001, **9**, 529-532.
- [201] C. M. Goncea, *Revista de Chimie (Bucharest, Romania)*, 2002, **53**, 251-252.
- [202] I.-S. Kim, S.-W. Choi, C.-D. Heo, and S.-C. Park, *Kongop Hwahak*, 2002, **13**, 33-36.
- [203] Z. Sun, X. Hu and D. Zhou, *TheScientificWorldJournal [electronic resource]*, 2002, **2**, 48-52.
- [204] C. M. Goncea, *Revista de Chimie (Bucharest, Romania)*, 2003, **54**, 963-964.
- [205] C. M. Goncea, *Revista de Chimie (Bucharest, Romania)*, 2003, **54**, 643-644.
- [206] S.-C. Park and I.-S. Kim, *Kongop Hwahak*, 2005, **16**, 206-211.



- [207] K. Scott, *The IChemE Research Event*, 1994, **1**, 344-346.
- [208] K. Scott, *Electrochem. Soc. Proc.*, **1994**, 94, 51-64.
- [209] S. D. Fleischmann, R. A. Pierce, US-Report WRSC-MS- 91-192, 180th Meeting of The Electrochemical Society, Phoenix Arizona, 1991.
- [210] F. Steele, *Platinum Met. Rev.*, 1990, **34**, 10-14.
- [211] U. Leffrang, K. Ebert, K. Flory, U. Galla and H. Schmieder, *Conf. Separation Sci. Techn.*, Gatlinburg, Tennessee, USA, 24–28 Oct. 1993.
- [212] R. D. Lide, (ed.), *CRC Handbook of Chemistry and Physics*, CRC Press, 73rd ed., 1992–1993, p. 17–27.
- [213] W. J. Plieth, *Encyclopedia of Electrochemistry of the Elements*, vol. 8, p. 440.
- [214] J. Bringmann, K. Ebert, U. Galla and H. Schmieder, *J. Appl. Electrochem.*, 1997, **27**, 870-872.
- [215] J. Bringmann, K. Ebert, U. Galla and H. Schmieder, *J. Appl. Electrochem.*, 1995, **25** 846-851.
- [216] J. Bringmann, K. Ebert, U. Galla, U. Leffrang and H. Schmieder, *ASME Heat Transfer Division*, 1995, **HTD-Vol. 317-2**, IMECE 289-297.
- [217] L.-C. Chiang, J.-E. Chang and T.-C. Wen, *Wat. Res.*, 1995, **29**, 671-678.
- [218] C.-C. Sun and T-C. Chou, *Ind. Eng. Chem. Res.*, 1999, **38**, 4545-4551.
- [219] A. S. Vaze, S. B. Sawant and V. G. Pangarkar, *J. Appl. Electrochem.*, 1999, **29**, 7-10.

- [220] G. A. Bogdanovskii, T. V. Savel'eva and T. S. Saburova, *Russian J. Electrochem.*, 2001, **37**, 865-869.
- [221] N. S. Abuzaid, Z. Al-Hamouz, A. A. Bukhari and M. H. Essa, *Water, Air and Soil Pollution*, 1999, **109**, 429-442.
- [222] J. Iniesta, J. Gonzalez-Garcia, E. Exposito, V. Montiel and A. Aldaz, *Wat. Res.*, 2001, **35**, 3291-3300.
- [223] A. G. Vlyssides, P. K. Karlis and G. Mahnken, *J. Appl. Electrochem.*, 2003, **33**, 155.
- [224] M. Panizza and G. Cerisola, *Environ. Sci. Technol.*, 2004, **38**, 5470-5474.
- [225] Joint Service Pollution Prevention Opportunity Handbook, the Naval Facilities Engineering Service Center  
([http://p2library.nfesc.navy.mil/P2\\_Opportunity\\_Handbook](http://p2library.nfesc.navy.mil/P2_Opportunity_Handbook))
- [226] M. Steensen, "Removal of non biodegradable organics from leachate by chemical oxidation" *Proceedings Sardinia 93, Fourth International landfill Symposium*, CISA publisher, Cagliari, vol. I, 945-958 (1993).
- [227] <http://www.cerox.com>
- [228] V. M. Bakhir, S. A. Panicheva and Y. G. Zadorozhni, *US Pat.*, 6 843 895, 2005.
- [229] <http://www.vbinstitute.ru/>
